# Supplementary material
Source: PubMed Central journal article supplement (PMC3366693)

**Studies Toward the Synthesis of Spirolide C: Exploration into the Formation of the 23-Membered All-Carbon Macrocyclic Framework**

Craig E. Stivala, Zhenhua Gu, Lindsay Smith, and Armen Zakarian

Department of Chemistry and Biochemistry, University of California, Santa Barbara, California 93106,  
United States

**SUPPORTING INFORMATION 2**

Copies of Spectra

1s-1-89-3

File: nmr500/Zakarian/lsmith/vnmr3s/data/1s-1-89-3.fid

Pulse Sequence: s2pul

Solvent: cdcl3

Ambient temperature

Operator: lsmith

File: 1s-1-89-3

INOVA-500 "nmrserver"

Relax. delay 4.800 sec

Pulse 74.9 degrees

Acq. time 2.500 sec

Width 8002.4 Hz

8 repetitions

OBSERVE H1, 499.8560410 MHz

DATA PROCESSING

Line broadening 0.2 Hz

FT size 32768

Total time 0 min, 0 sec

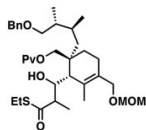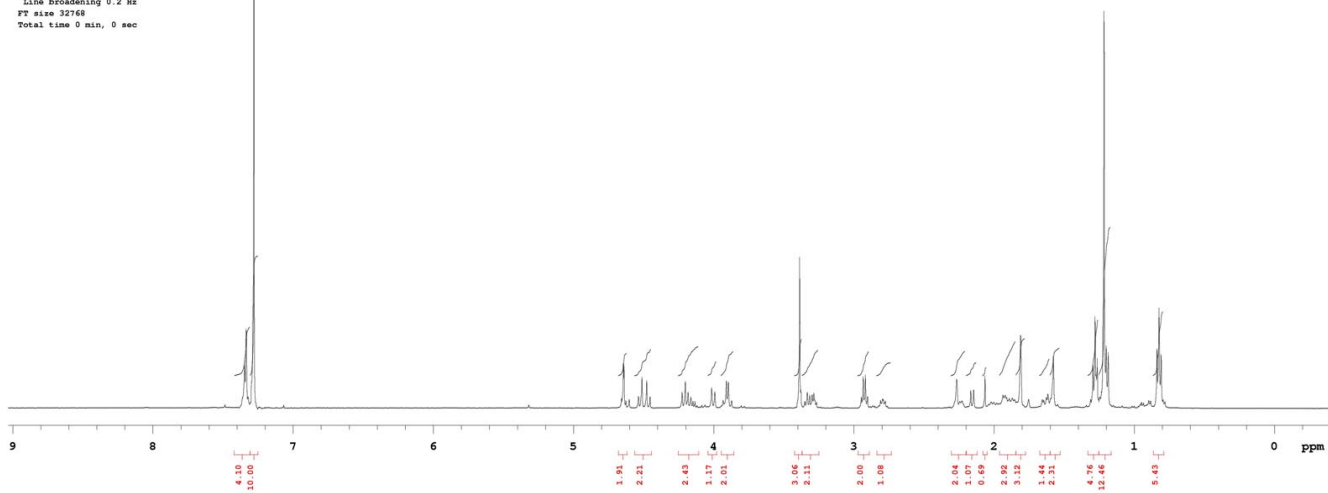

1s-1-112-2-carbon

File: nmr500/Zakarian/lsmith/vnmr3s/data/1s-1-112-2-carbon.fid

Pulse Sequence: s2pul

Solvent: CDCl3

Ambient temperature

Operator: lsmith

File: 1s-1-112-2-carbon

INOVA-500 "nmrserver"

Relax. delay 1.000 sec

Pulse 43.2 degrees

Acq. time 1.303 sec

Width 30164.9 Hz

344 repetitions

OBSERVE C13, 125.6888764 MHz

DECOUPLE H1, 499.8585468 MHz

Power 38 dB

continuously on

WALTZ-16 modulated

DATA PROCESSING

Line broadening 0.5 Hz

FT size 131072

Total time 6 hr, 25 min, 20 sec

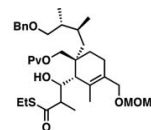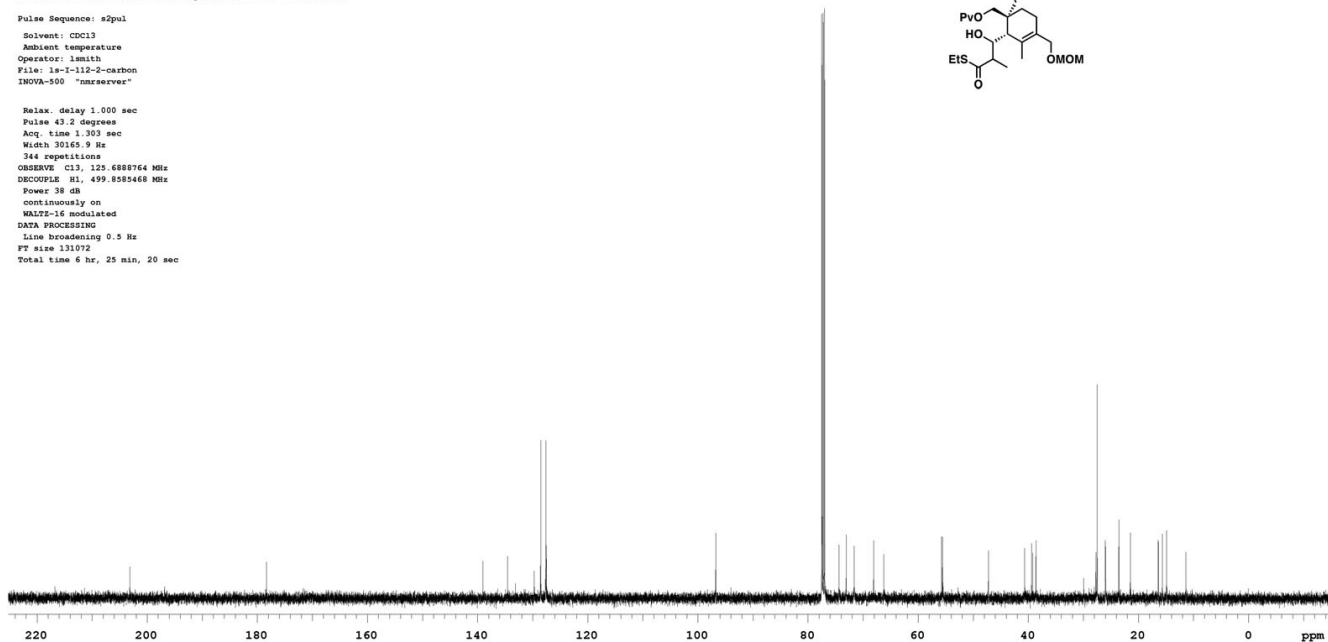

1s-1-95-2

File: nmr400/Zakarian/ismith/vnmr3s/data/1s-1-95-2.fid

Pulse Sequence: s2pul

Solvent: cdcl3

Ambient temperature

Operator: ismith

File: 1s-1-95-2

INOVA-500 "nmrserver"

Relax. delay 4.800 sec

Pulse 75.0 degrees

Acq. time 2.500 sec

Width 8002.4 Hz

8 repetitions

OBSERVE H1, 399.9486643 MHz

DATA PROCESSING

Line broadening 0.2 Hz

FT size 65536

Total time 1 min, 0 sec

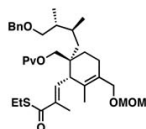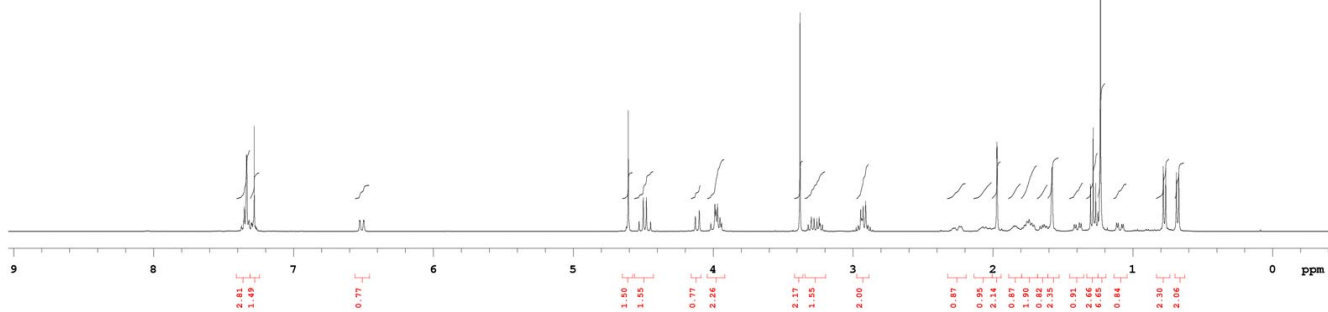

1s-1-95-2-carbon

File: nmr400/Zakarian/ismith/vnmr3s/data/1s-1-95-2-carbon.fid

Pulse Sequence: s2pul

Solvent: cdcl3

Ambient temperature

Operator: ismith

File: 1s-1-95-2-carbon

INOVA-500 "nmrserver"

Relax. delay 1.300 sec

Pulse 23.8 degrees

Acq. time 1.000 sec

Width 28040.7 Hz

84 repetitions

OBSERVE C13, 100.5671547 MHz

DECOUPLE H1, 399.9506784 MHz

Power: 40 dB

continuously on

WALTZ-16 modulated

DATA PROCESSING

Line broadening 1.0 Hz

FT size 65536

Total time 8 hr, 12 min, 44 sec

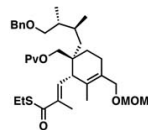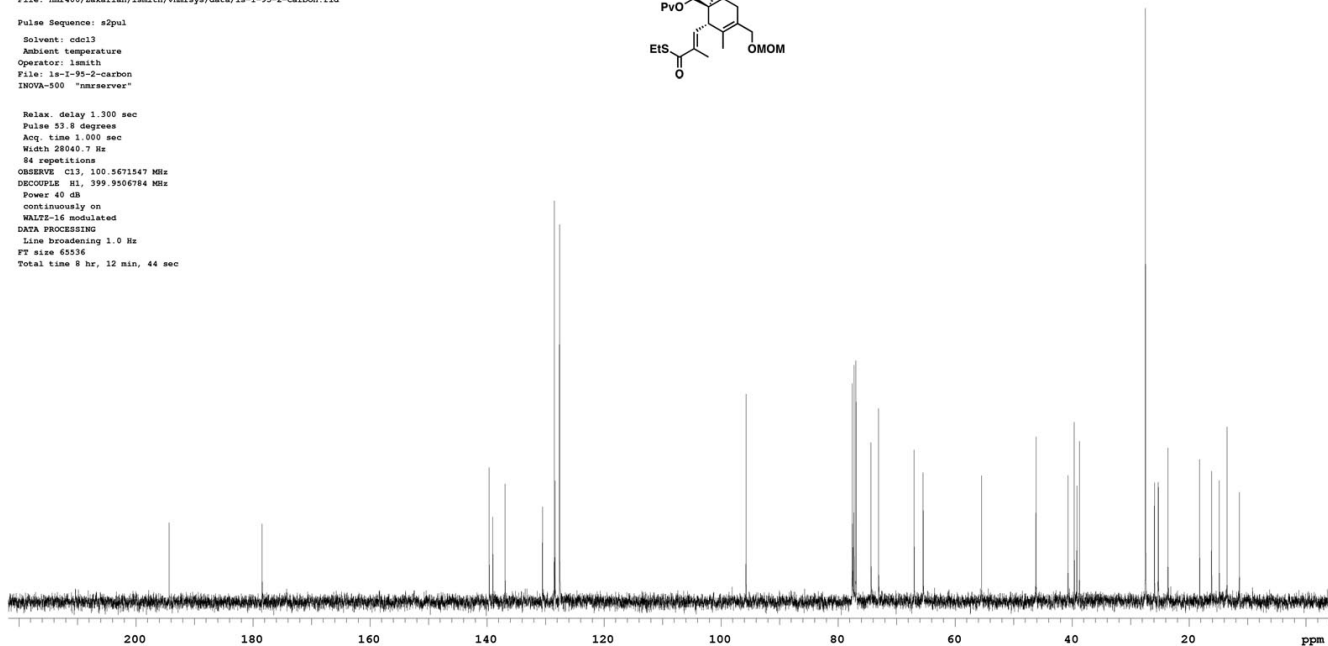

1s-1-95-4

File: nmr400/Zakarian/lsmith/vnmrsys/data/1s-1-95-4.fid

Pulse Sequence: s2pul

Solvent: cdcl3

Ambient temperature

Operator: lsmith

File: 1s-1-95-4

INOVA-500 "nmrserver"

Relax. delay 4.800 sec

Pulse 75.0 degrees

Acq. time 2.500 sec

Width 8002.4 Hz

8 repetitions

OBSERVE H1, 399.9486643 MHz

DATA PROCESSING

Line broadening 0.2 Hz

FT size 65536

Total time 1 min, 0 sec

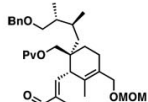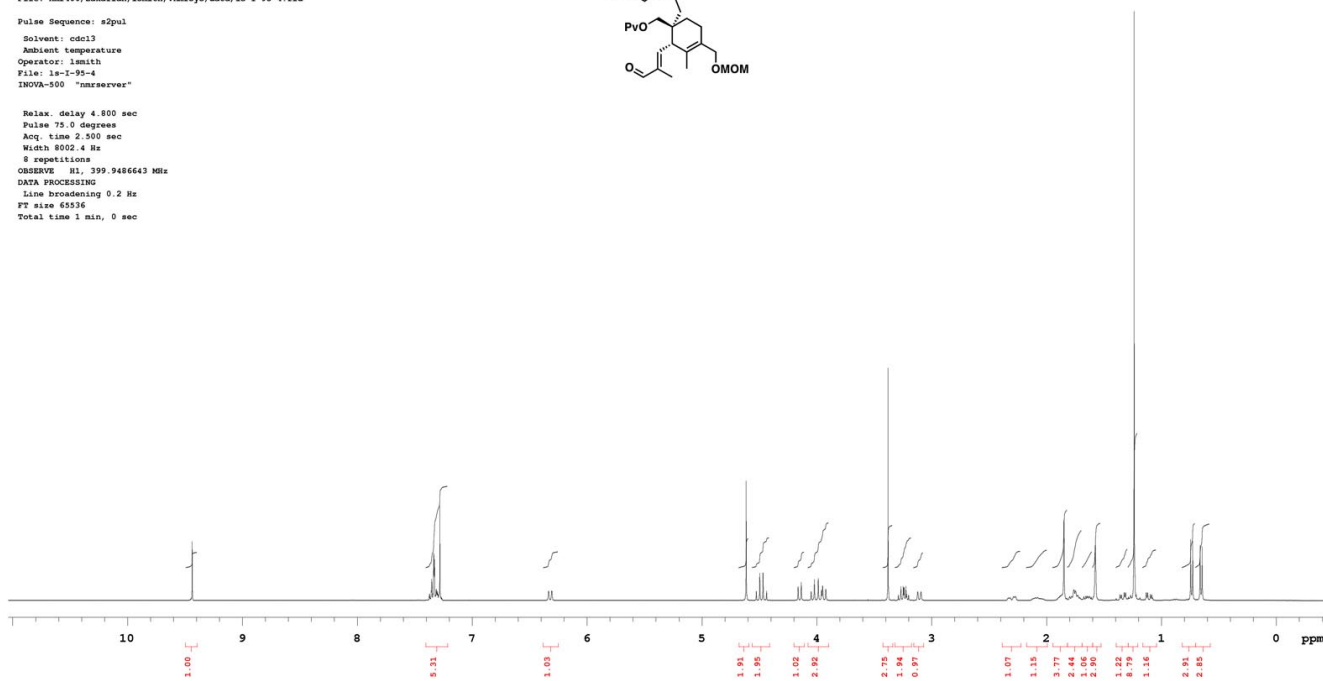

1s-1-95-4-carbon

File: nmr400/Zakarian/lsmith/vnmrsys/data/1s-1-95-4-carbon.fid

Pulse Sequence: s2pul

Solvent: cdcl3

Ambient temperature

Operator: lsmith

File: 1s-1-95-4-carbon

INOVA-500 "nmrserver"

Relax. delay 1.300 sec

Pulse 23.8 degrees

Acq. time 1.000 sec

Width 28040.7 Hz

32 repetitions

OBSERVE C13, 100.5671556 MHz

DECOUPLE H1, 399.9506784 MHz

Power 40 dB

continuously on

WALTZ-16 modulated

DATA PROCESSING

Line broadening 1.0 Hz

FT size 65536

Total time 8 hr, 12 min, 44 sec

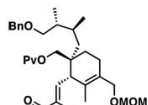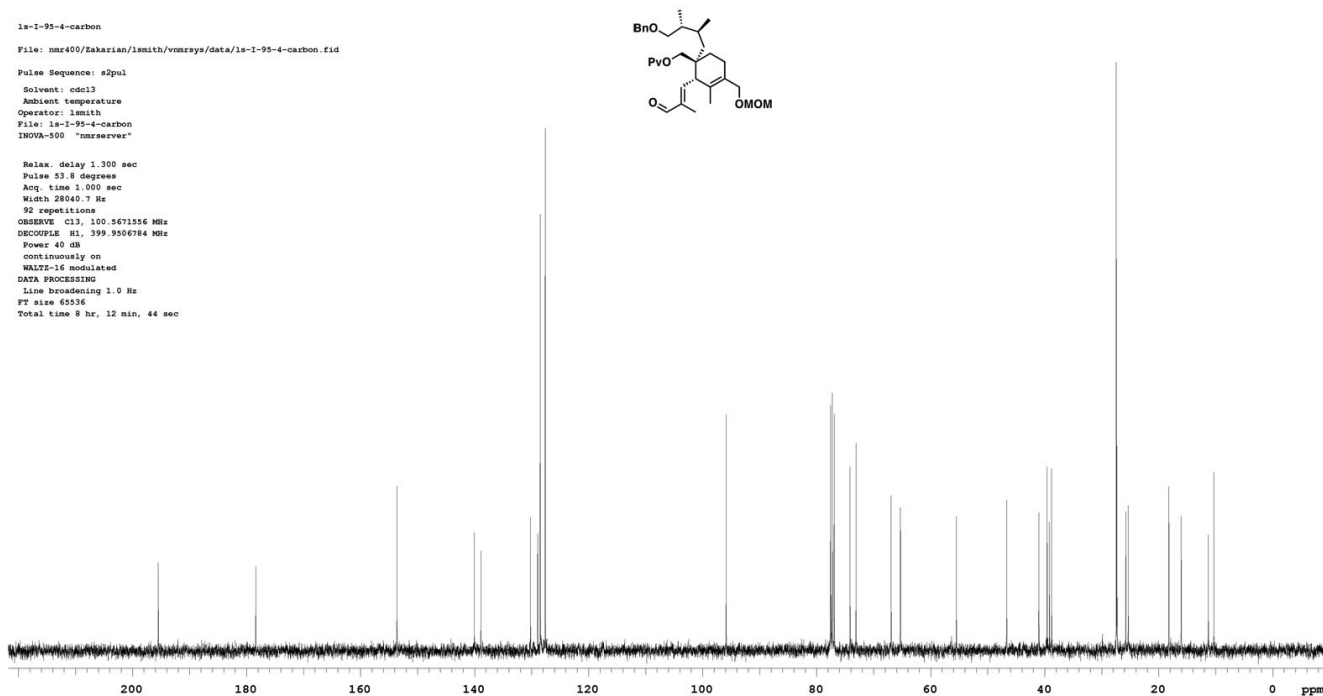



1s-1-103-4  
 File: nmr400/Zakarian/ismith/vnmrsvs/data/1s-1-103-4.fid  
 Pulse Sequence: s2pul  
 Solvent: cdcl3  
 Ambient temperature  
 Operator: ismith  
 File: 1s-1-103-4  
 INOVA-500 "nmrserver"  
 Relax. delay 4.800 sec  
 Pulse 75.0 degrees  
 Acq. time 2.500 sec  
 Width 8002.4 Hz  
 8 repetitions  
 OBSERVE H1, 399.9486643 MHz  
 DATA PROCESSING  
 Line broadening 0.2 Hz  
 FT size 65536  
 Total time 1 min, 0 sec

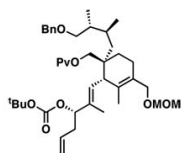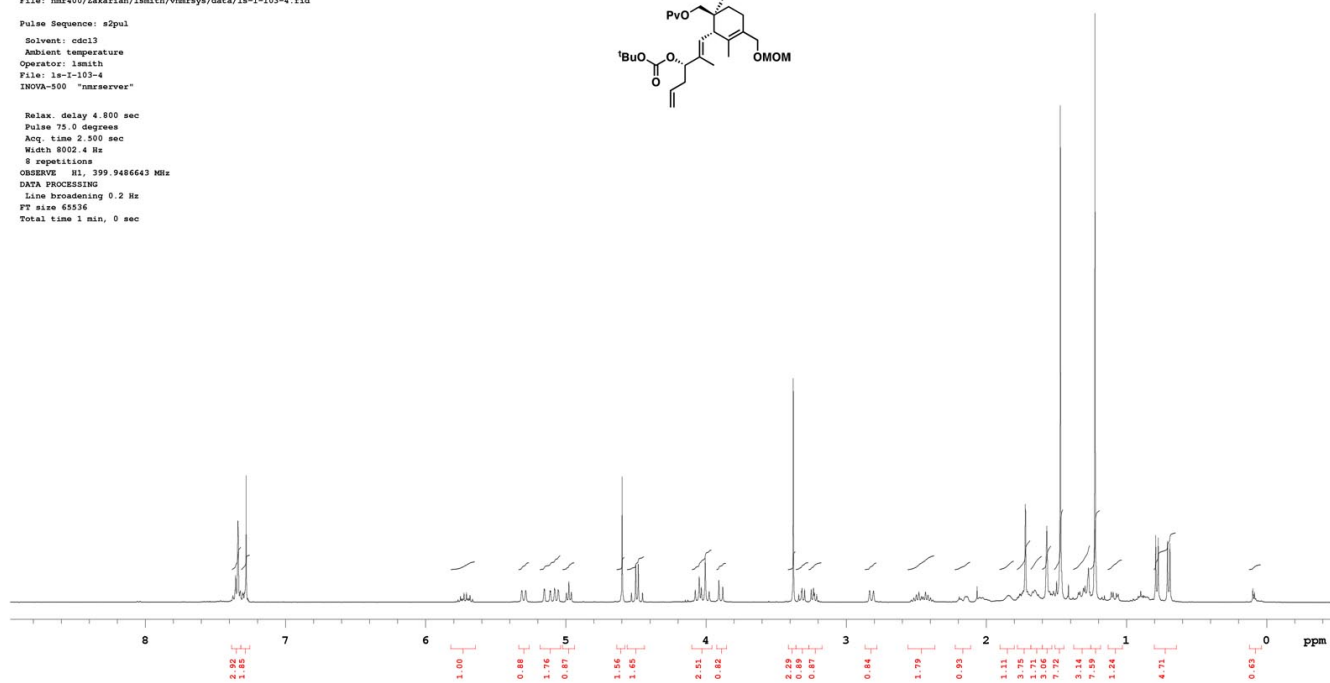

1s-1-103-4-carbon  
 File: nmr400/Zakarian/ismith/vnmrsvs/data/1s-1-103-4-carbon.fid  
 Pulse Sequence: s2pul  
 Solvent: cdcl3  
 Ambient temperature  
 Operator: ismith  
 File: 1s-1-103-4-carbon  
 INOVA-500 "nmrserver"  
 Relax. delay 1.300 sec  
 Pulse 23.8 degrees  
 Acq. time 1.000 sec  
 Width 28040.7 Hz  
 452 repetitions  
 OBSERVE C13, 100.5671530 MHz  
 DECOUPLE H1, 399.9506784 MHz  
 Power 40 dB  
 continuously on  
 WALTZ-16 modulated  
 DATA PROCESSING  
 Line broadening 1.0 Hz  
 FT size 65536  
 Total time 8 hr, 12 min, 44 sec

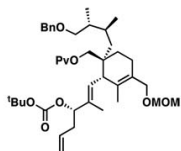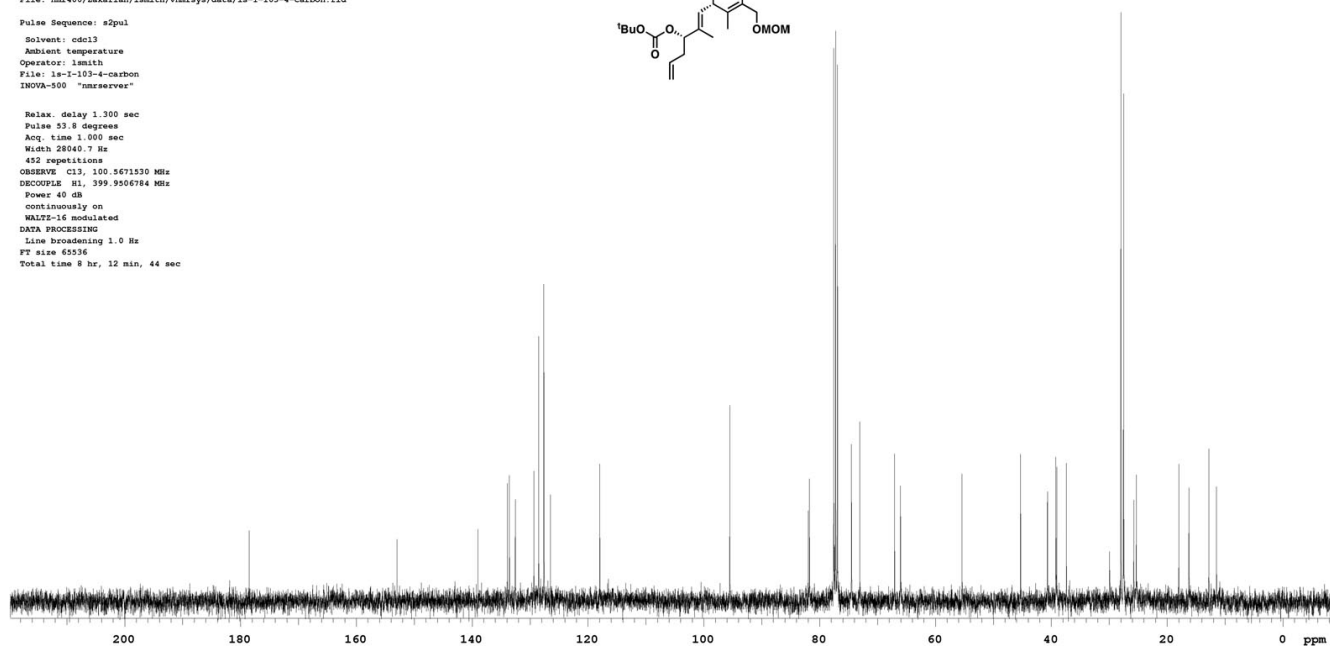

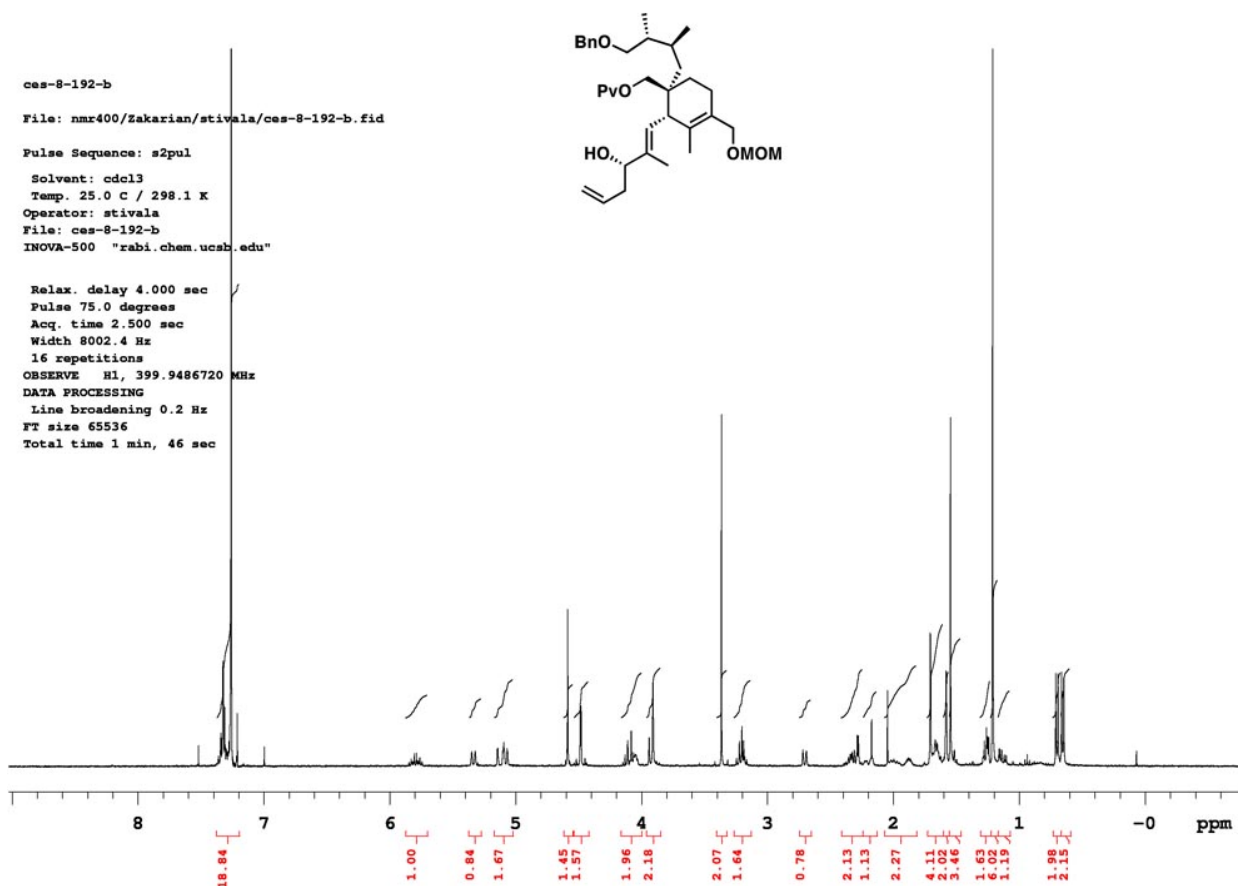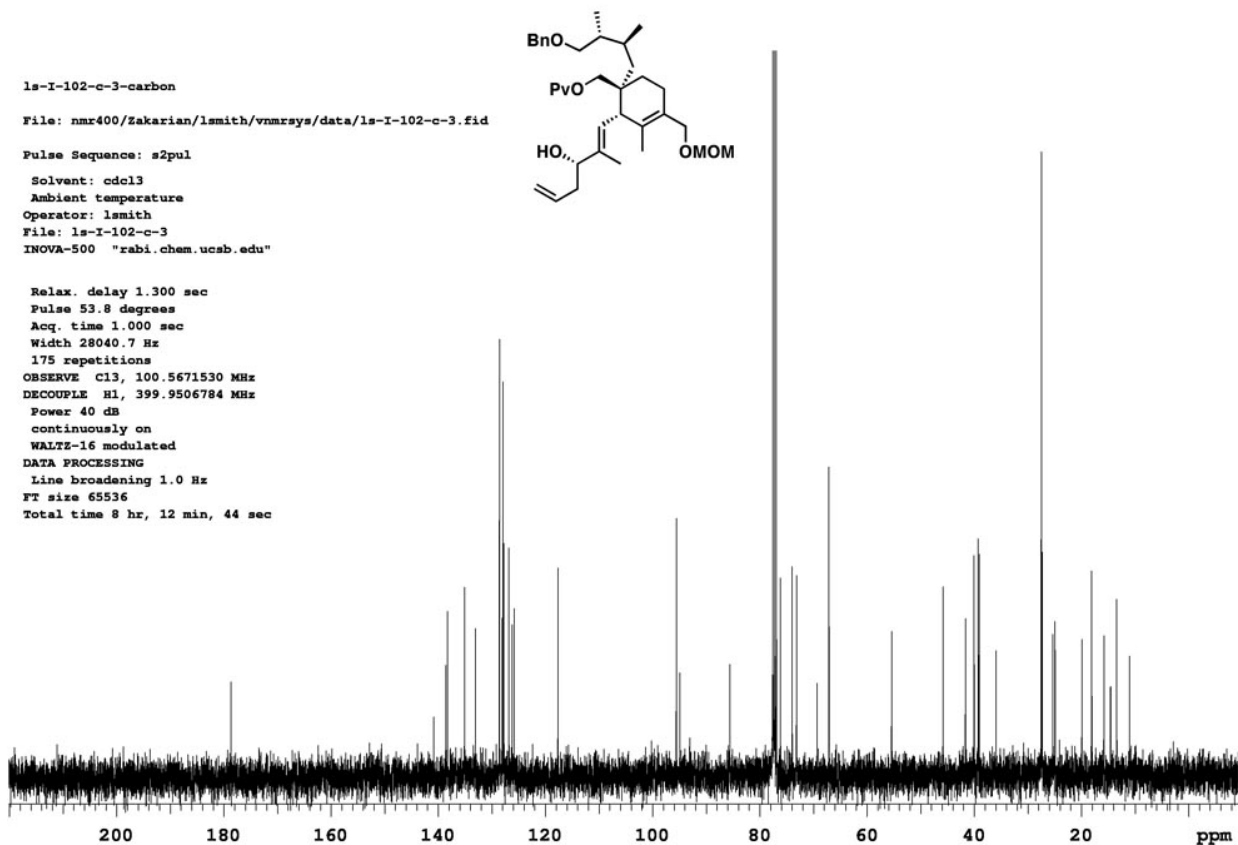

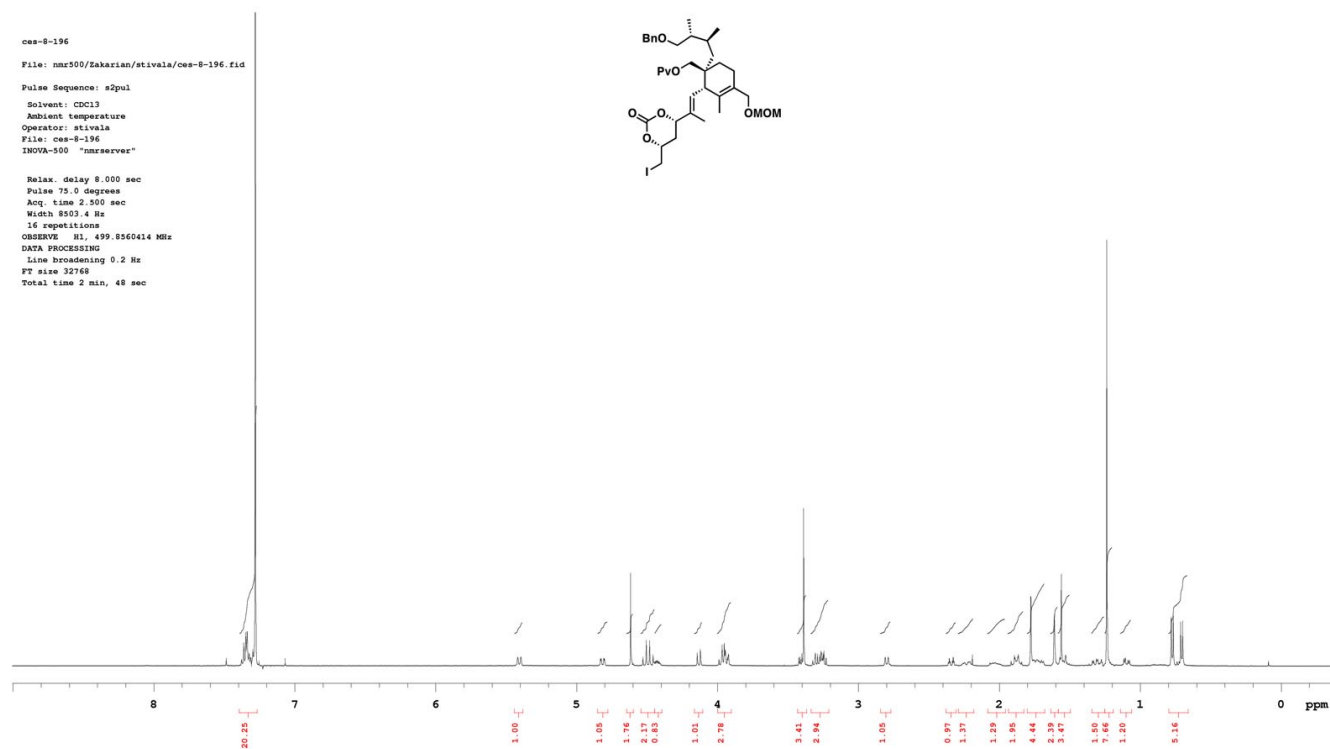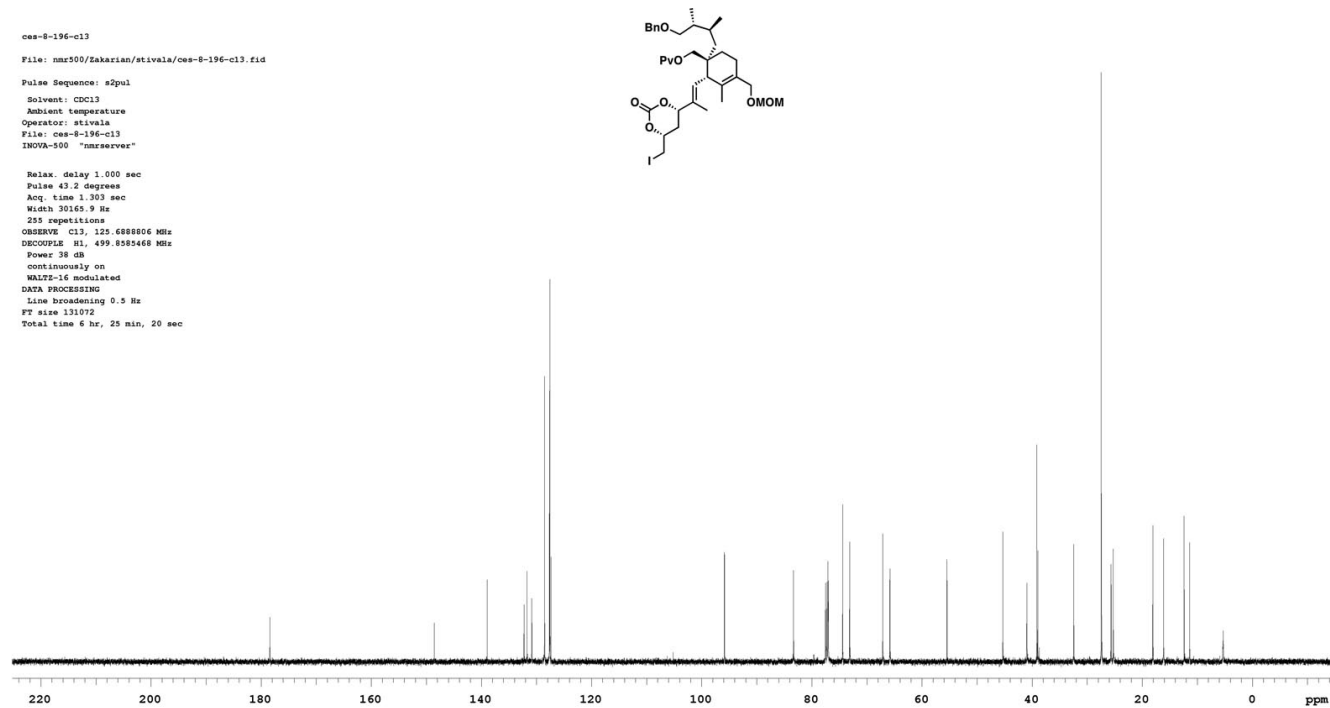

ces-8-197

File: nmr400/Zakarian/stivala/ces-8-197.fid

Pulse Sequence: s2pul

Solvent: cdcl3

Temp: 25.0 C / 298.1 K

Operator: stivala

File: ces-8-197

INOVA-500 "nmrserver"

Relax. delay 4.000 sec

Pulse 75.0 degrees

Acq. time 2.500 sec

Width 8002.4 Hz

4 repetitions

OBSERVE H1, 399.9486645 MHz

DATA PROCESSING

Line broadening 0.2 Hz

FT size 65536

Total time 0 min, 28 sec

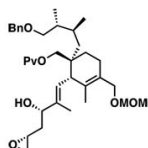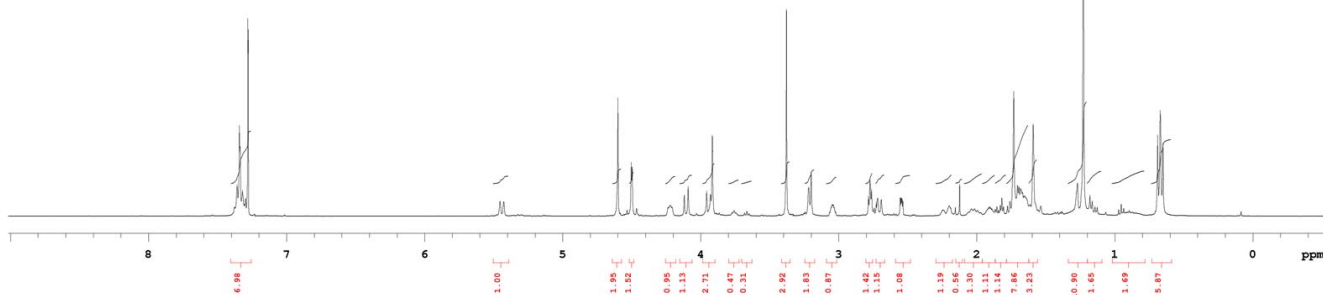

ces-8-197-c13

File: nmr500/Zakarian/stivala/ces-8-197-c13.fid

Pulse Sequence: s2pul

Solvent: CDCl3

Ambient temperature

Operator: stivala

File: ces-8-197-c13

INOVA-500 "nmrserver"

Relax. delay 1.000 sec

Pulse 43.2 degrees

Acq. time 1.303 sec

Width 30164.9 Hz

135 repetitions

OBSERVE C13, 125.6888760 MHz

DECOUPLE H1, 499.8585468 MHz

Power 38 dB

continuously on

WALTZ-16 modulated

DATA PROCESSING

Line broadening 0.5 Hz

FT size 131072

Total time 6 hr, 25 min, 20 sec

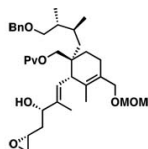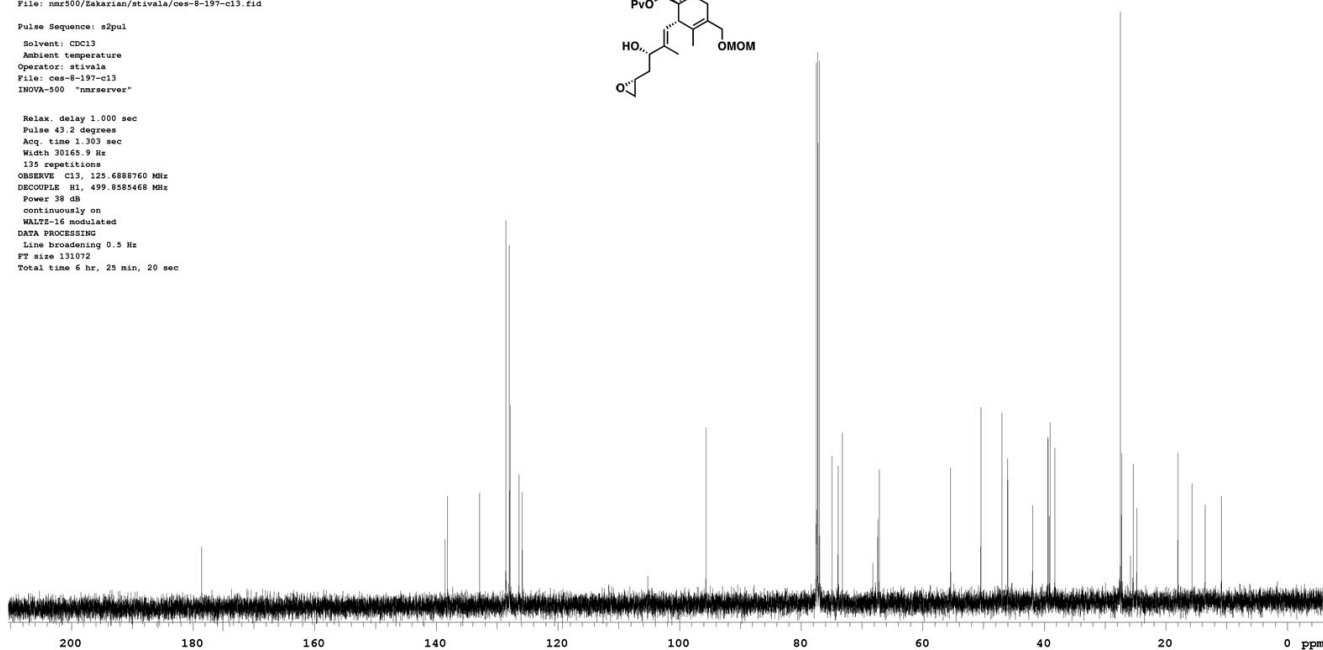

ces-8-199-r2-b

File: nmr600/Zakarian/stivala/ces-8-199-r2-b.fid

Pulse Sequence: s2pul

Solvent: cdcl3

Temp. 25.0 C / 298.1 K

Operator: stivala

File: ces-8-199-r2-b

INOVA-500 "rabi.chem.ucsb.edu"

Relax. delay 8.000 sec  
 Pulse 74.9 degrees  
 Acq. time 2.500 sec  
 Width 10000.0 Hz  
 8 repetitions  
 OBSERVE H1, 599.6321125 MHz  
 DATA PROCESSING  
 Line broadening 0.2 Hz  
 FT size 32768  
 Total time 1 min, 24 sec

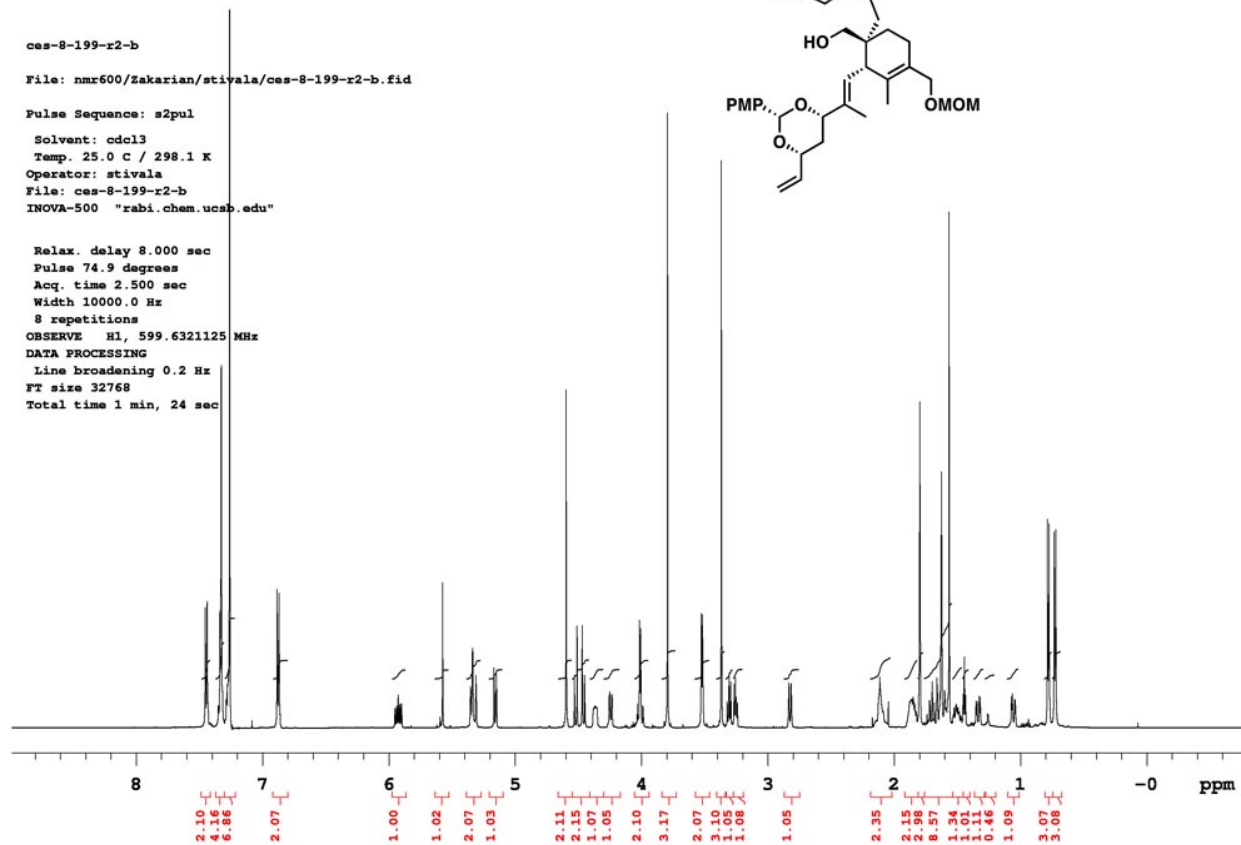

ces-8-199-r2-b-c13

Sample: 1\_Indanone

File: nmr600/Zakarian/stivala/ces-8-199-r2-b-c13.fid

Pulse Sequence: s2pul

Solvent: cdcl3

Temp. 25.0 C / 298.1 K

Operator: stivala

File: ces-8-199-r2-b-c13

INOVA-500 "nmserver"

Relax. delay 1.000 sec  
 Pulse 10.0 usec  
 Acq. time 1.299 sec  
 Width 36199.1 Hz  
 383 repetitions  
 OBSERVE C13, 150.7778603 MHz  
 DECOUPLE H1, 599.6321003 MHz  
 Power 34 dB  
 continuously on  
 WALTZ-16 modulated  
 DATA PROCESSING  
 Line broadening 0.5 Hz  
 FT size 131072  
 Total time 6 hr, 25 min, 13 sec

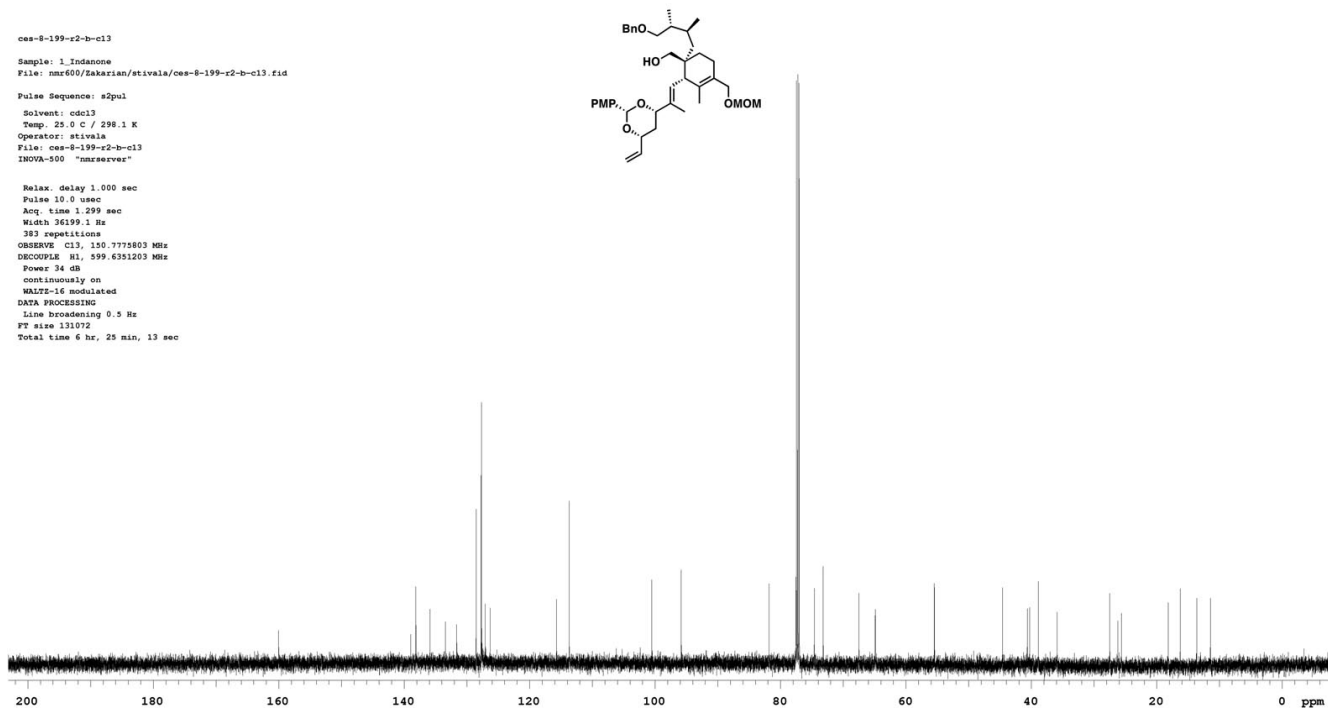

ces-8-200

File: nmr600/Zakarian/stivala/ces-8-200.fid

Pulse Sequence: s2pul

Solvent: cdcl3

Temp: 25.0 C / 298.1 K

Operator: stivala

File: ces-8-200

INOVA-500 "nmrserver"

Relax. delay 8.000 sec

Pulse 74.9 degrees

Acq. time 2.500 sec

Width 10000.0 Hz

8 repetitions

OBSERVE H1, 599.6320999 MHz

DATA PROCESSING

Line broadening 0.2 Hz

FT size 32768

Total time 1 min, 24 sec

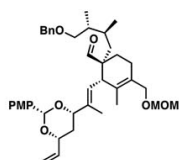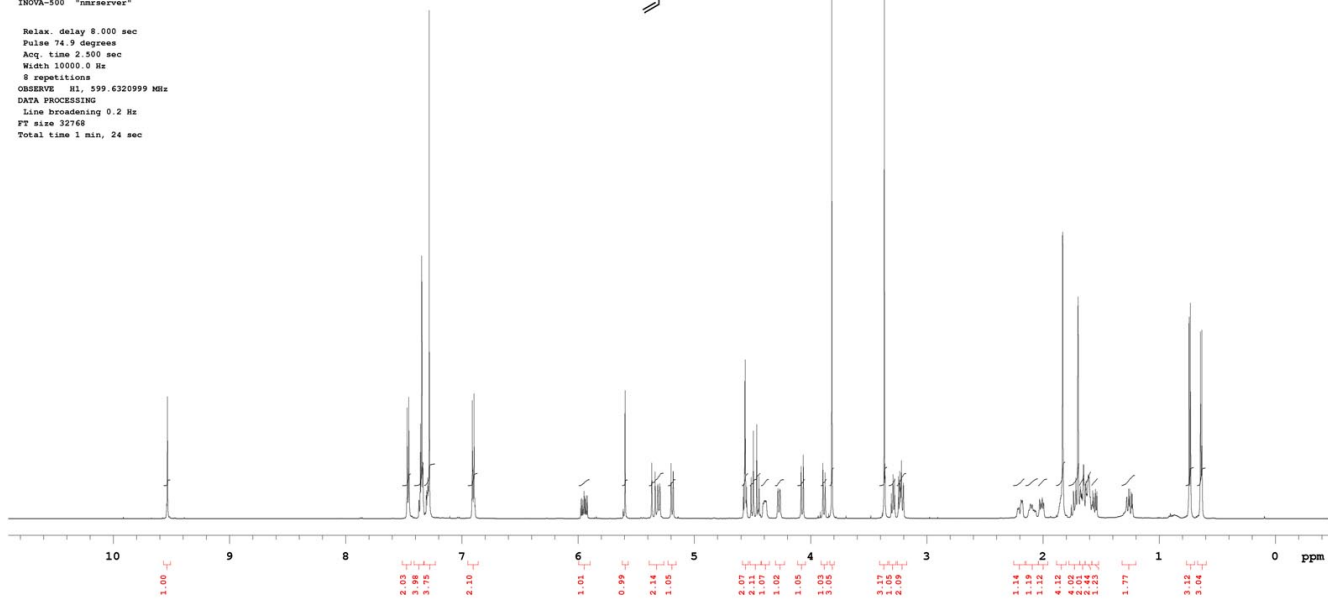

ces-8-200-c13

Sample: 1 Indanone

File: nmr600/Zakarian/stivala/ces-8-200-c13.fid

Pulse Sequence: s2pul

Solvent: cdcl3

Temp: 25.0 C / 298.1 K

Operator: stivala

File: ces-8-200-c13

INOVA-500 "nmrserver"

Relax. delay 1.000 sec

Pulse 10.0 usec

Acq. time 1.299 sec

Width 36199.1 Hz

415 repetitions

OBSERVE C13, 150.7775820 MHz

DECOUPLE H1, 599.6351203 MHz

Power 34 dB

continuously on

WALTZ-16 modulated

DATA PROCESSING

Line broadening 0.5 Hz

FT size 131072

Total time 6 hr, 25 min, 13 sec

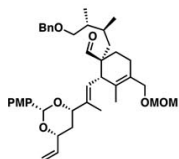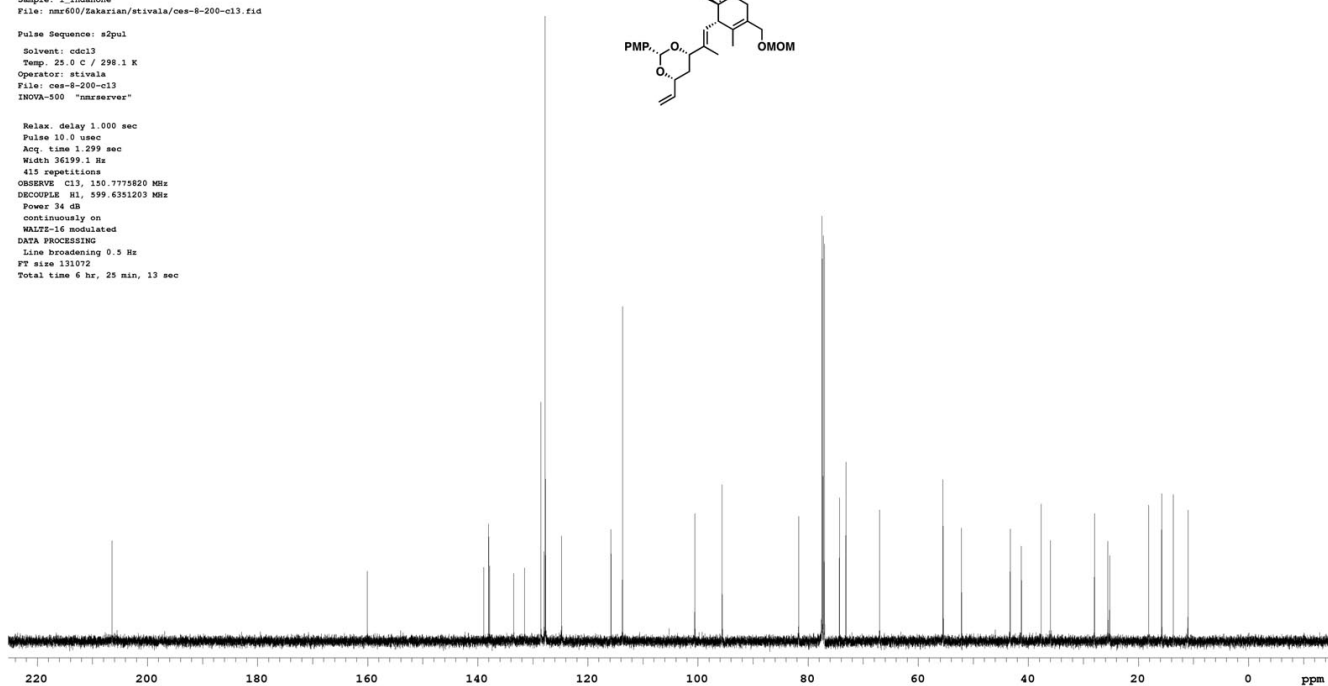

ces-5-169-b

File: nmr400/Zakarian/stivala/ces-5-169-b.idp.fid

Pulse Sequence: s2pul

Solvent: cdcl3  
 Ambient temperature  
 Operator: stivala  
 File: ces-5-169-b.idp  
 INOVA-500 "rabi.chem.ucsb.edu"

Relax. delay 8.000 sec  
 Pulse 83.1 degrees  
 Acq. time 2.003 sec  
 Width 5000.0 Hz  
 8 repetitions  
 OBSERVE H1, 399.9486717 MHz  
 DATA PROCESSING  
 Resol. enhancement -0.0 Hz  
 FT size 32768  
 Total time 1 min, 22 sec

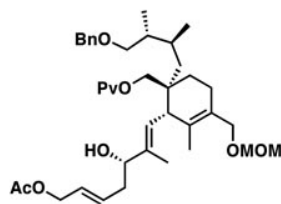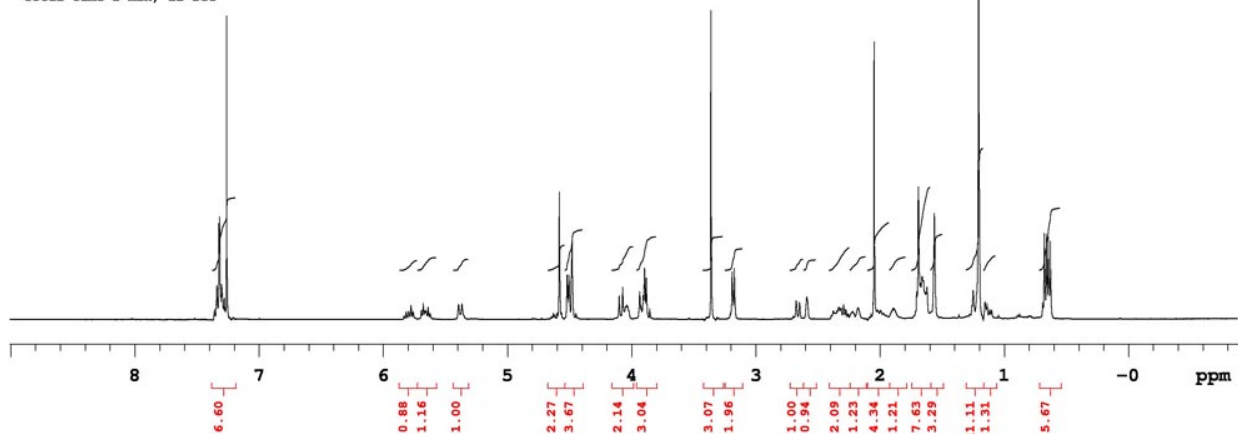

ces-5-171

File: nmr500/Zakarian/stivala/ces-5-171.swp.fid

Pulse Sequence: s2pul

Solvent: cdcl3  
 Temp. 22.0 C / 295.1 K  
 Operator: stivala  
 File: ces-5-171.swp  
 INOVA-500 "rabi.chem.ucsb.edu"

Relax. delay 8.000 sec  
 Pulse 81.1 degrees  
 Acq. time 2.732 sec  
 Width 5997.0 Hz  
 8 repetitions  
 OBSERVE H1, 499.8563614 MHz  
 DATA PROCESSING  
 Line broadening 0.2 Hz  
 FT size 32768  
 Total time 1 min, 26 sec

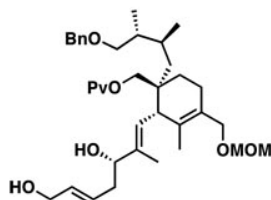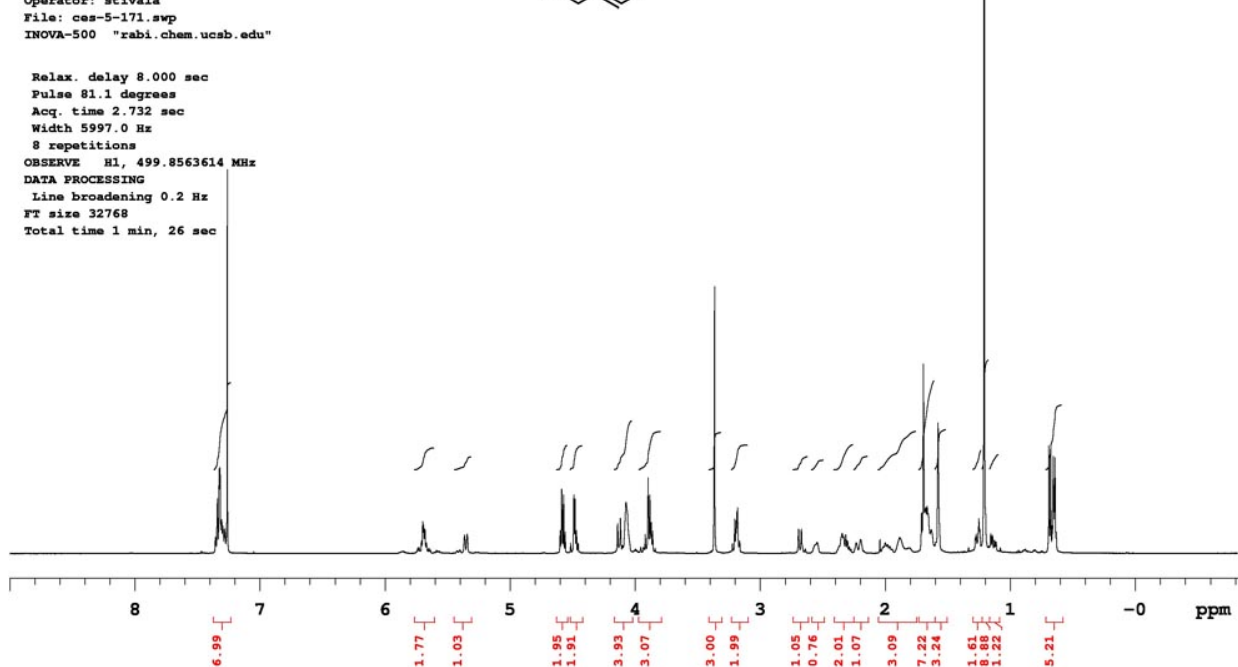

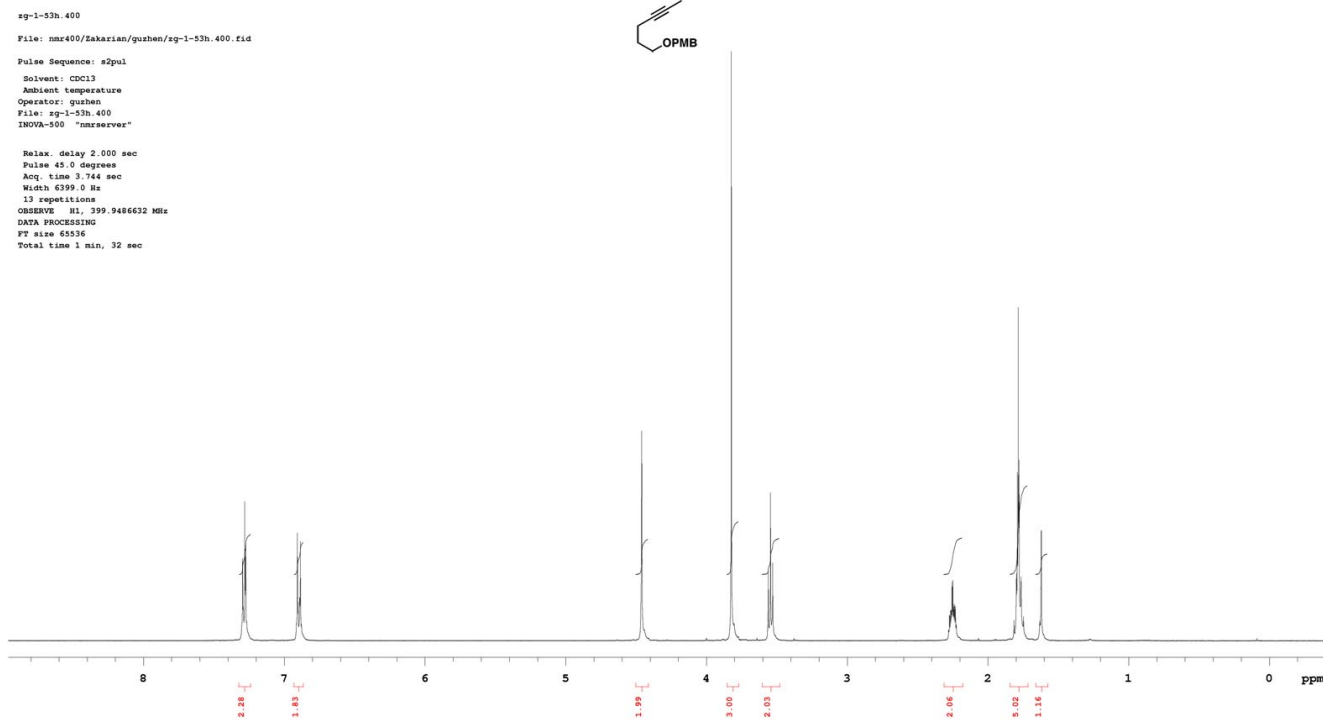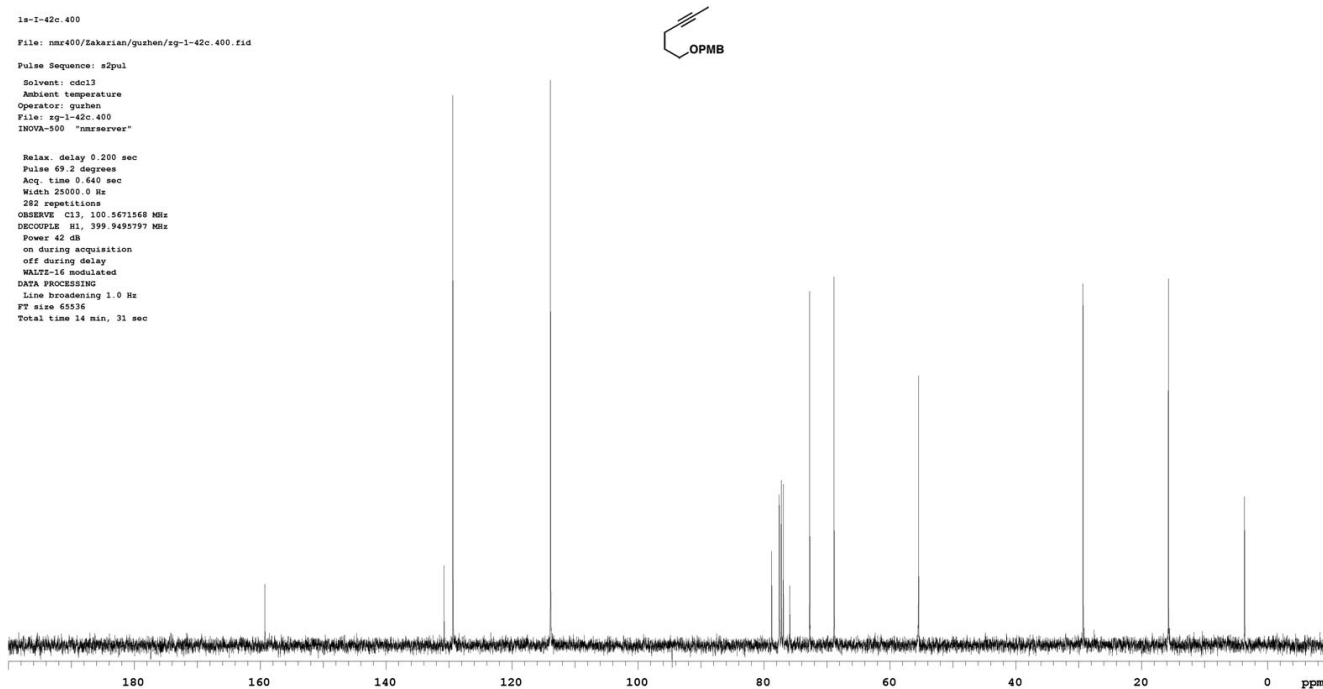



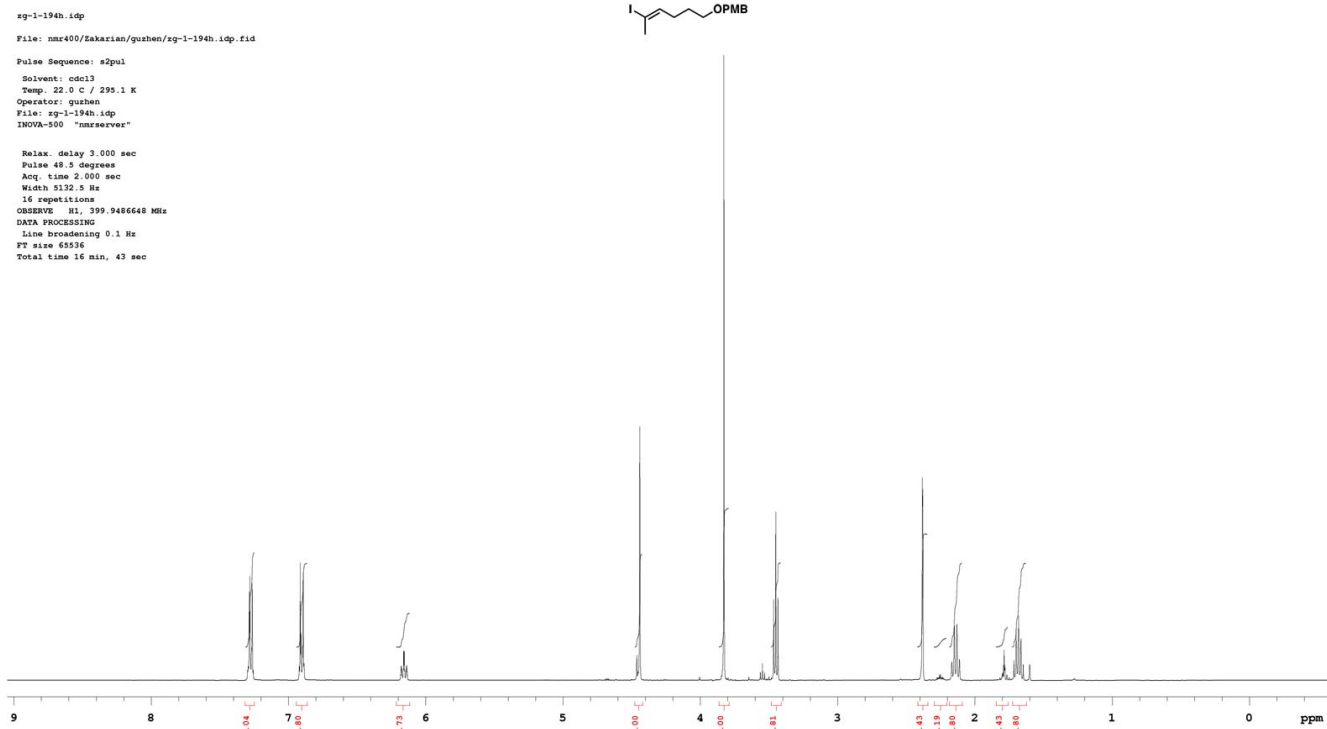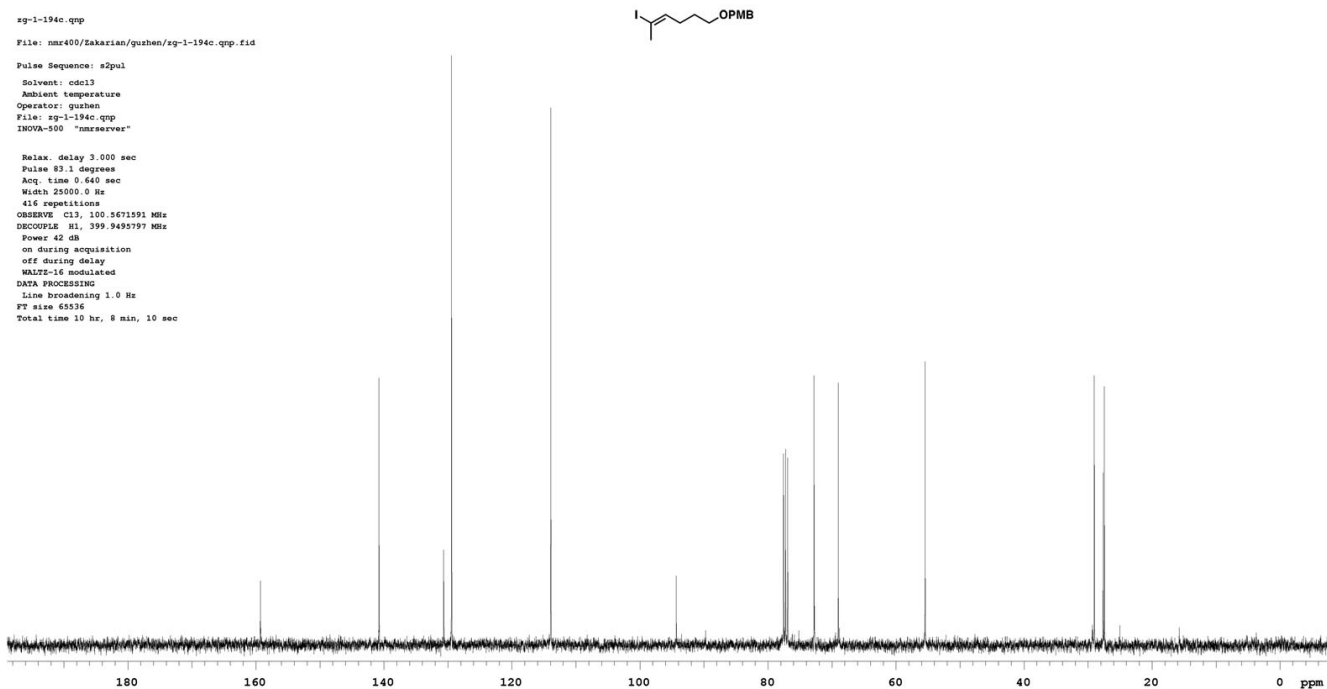

zg-1-70-2-h.idp

File: nmr400/Zakarian/guzhen/zg-1-70-2-h.idp.fid

Pulse Sequence: s2pul

Solvent: cdcl3  
Temp: 22.0 C / 295.1 K  
Operator: guzhen  
File: zg-1-70-2-h.idp  
INOVA-500 "maserver"Relax. delay 3.000 sec  
Pulse 48.5 degrees  
Acq. time 2.000 sec  
Width 5132.5 Hz  
15 repetitions  
OBSERVE H1, 399.9486641 MHz  
DATA PROCESSING  
Line broadening 0.1 Hz  
FT size 65536  
Total time 16 min, 43 sec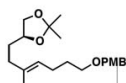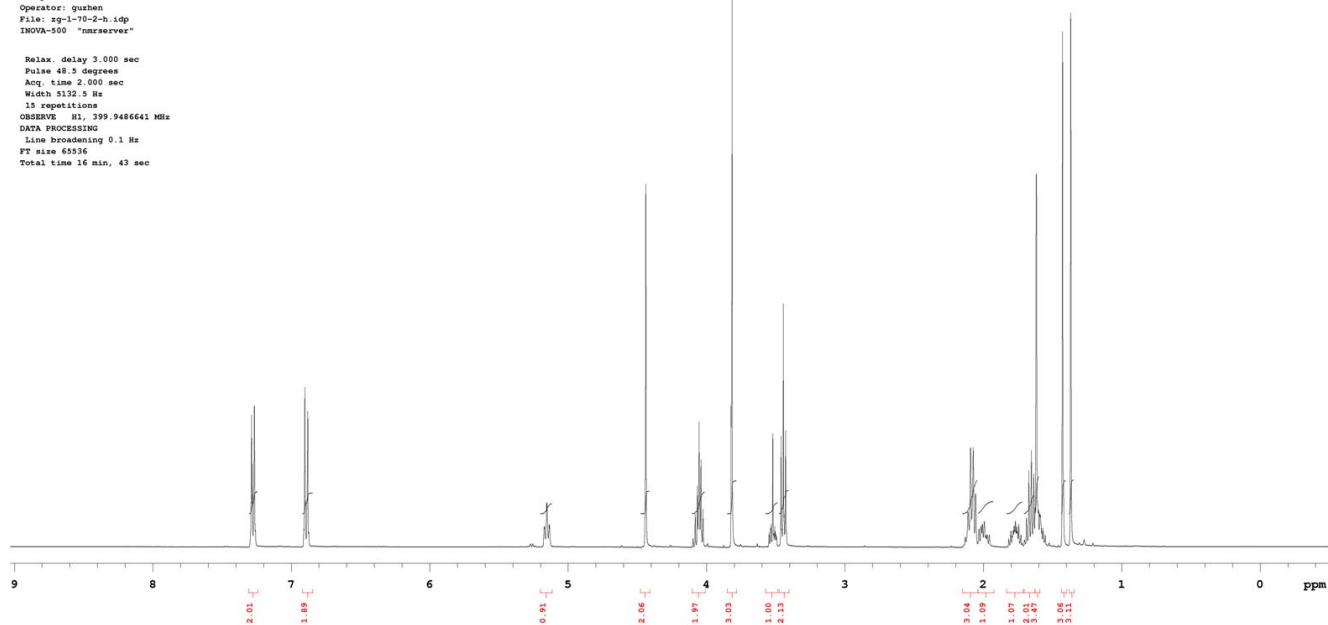

zg-1-70-2c.400

File: nmr400/Zakarian/guzhen/zg-1-70-2c.400.fid

Pulse Sequence: s2pul

Solvent: cdcl3  
Ambient temperature  
Operator: guzhen  
File: zg-1-70-2c.400  
INOVA-500 "rabi.chem.ucsb.edu"Relax. delay 0.800 sec  
Pulse 69.2 degrees  
Acq. time 0.640 sec  
Width 25000.0 Hz  
968 repetitions  
OBSERVE C13, 100.5671544 MHz  
DECOUPLE H1, 399.9495797 MHz  
Power 42 dB  
on during acquisition  
off during delay  
WALTZ-16 modulated  
DATA PROCESSING  
Line broadening 1.0 Hz  
FT size 65536  
Total time 24 min, 45 sec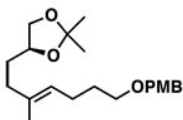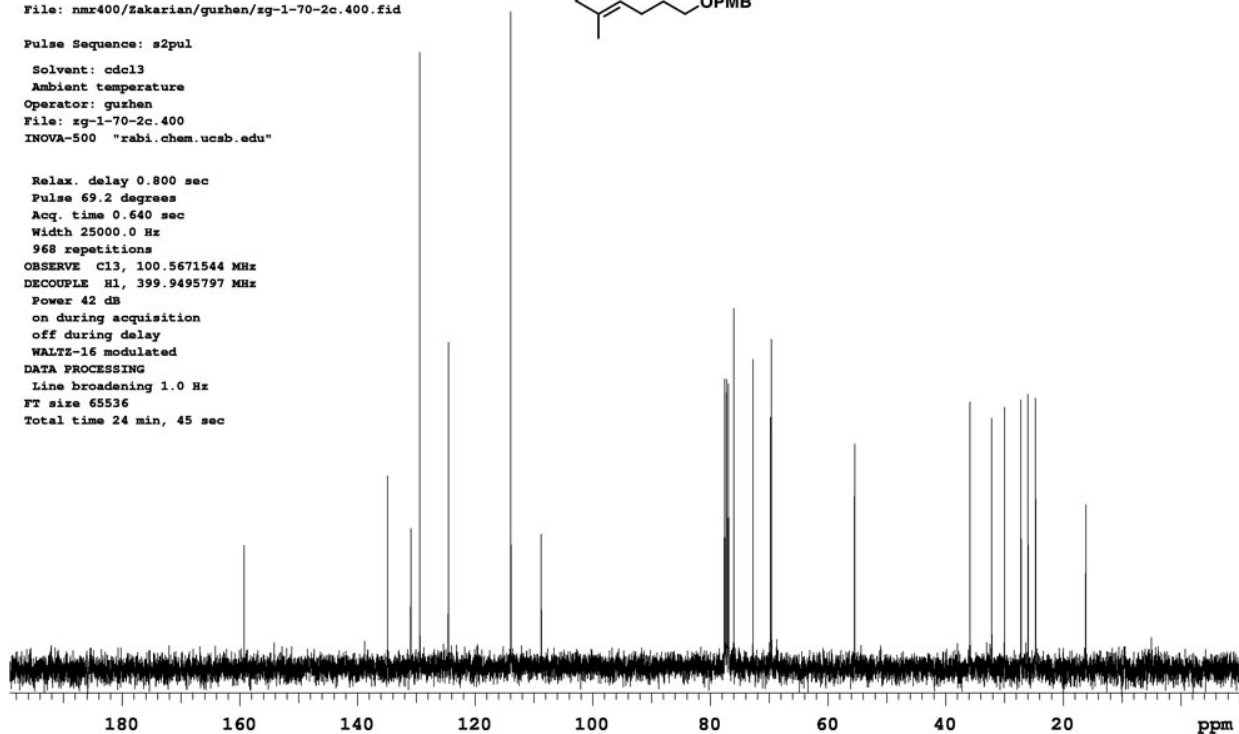

sg-1-68h.idp

File: nmr400/Zakarian/guzhen/sg-1-68h.idp.fid

Pulse Sequence: s2pul  
 Solvent: cdcl3  
 Temp: 22.0 C / 295.1 K  
 Operator: guzhen  
 File: sg-1-68h.idp  
 INOVA-500 "nmrserver"

Relax. delay 3.000 sec  
 Pulse 48.5 degrees  
 Acq. time 2.000 sec  
 Width 5132.9 Hz  
 18 repetitions  
 OBSERVE H1, 399.9486639 MHz  
 DATA PROCESSING  
 Line broadening 0.1 Hz  
 FT size 65536  
 Total time 16 min, 43 sec

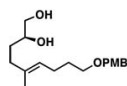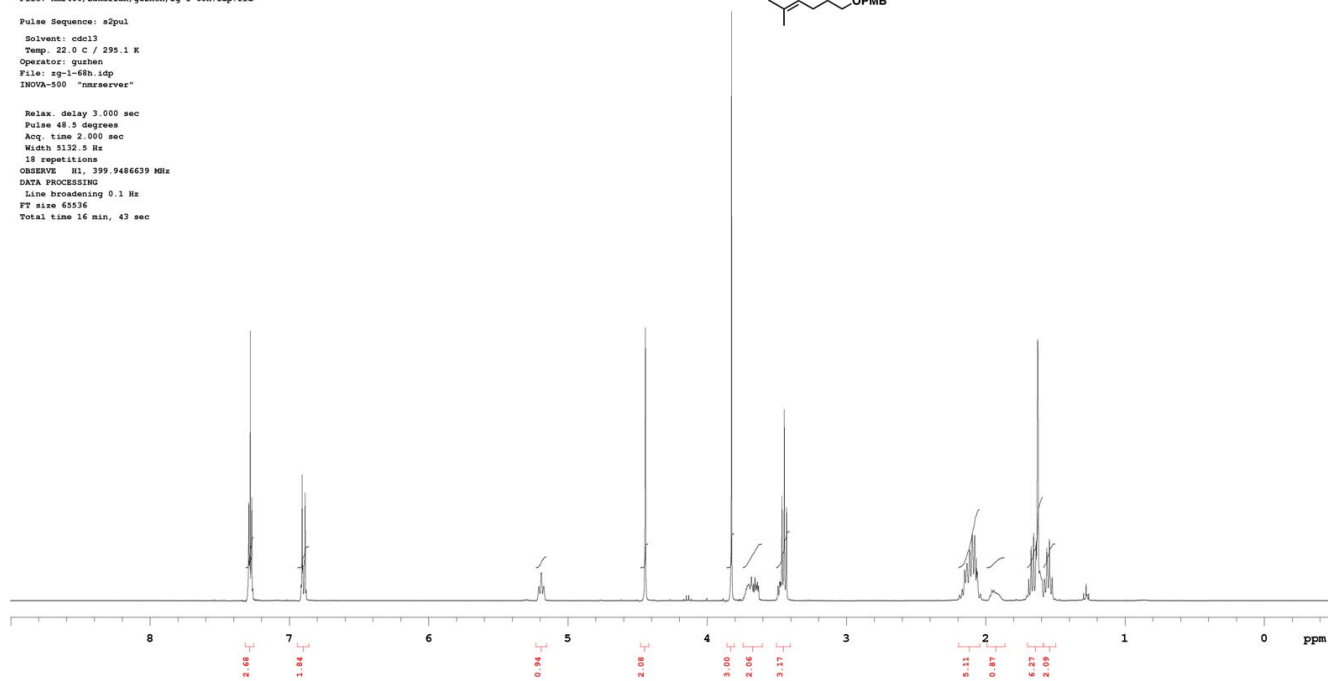

sg-1-68c.500

File: nmr500/Zakarian/guzhen/sg-1-68c.500.fid

Pulse Sequence: s2pul  
 Solvent: cdcl3  
 Temp: 22.0 C / 295.1 K  
 Operator: guzhen  
 File: sg-1-68c.500  
 INOVA-500 "nmrserver"

Relax. delay 0.700 sec  
 Pulse 48.7 degrees  
 Acq. time 1.300 sec  
 Width 28258.6 Hz  
 258 repetitions  
 OBSERVE C13, 125.6889552 MHz  
 DECOUPLE H1, 499.8588575 MHz  
 Power 36 dB  
 on during acquisition  
 off during delay  
 WALTZ-16 modulated  
 DATA PROCESSING  
 Line broadening 0.5 Hz  
 FT size 131072  
 Total time 558 hr, 9 min, 21 sec

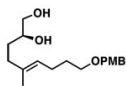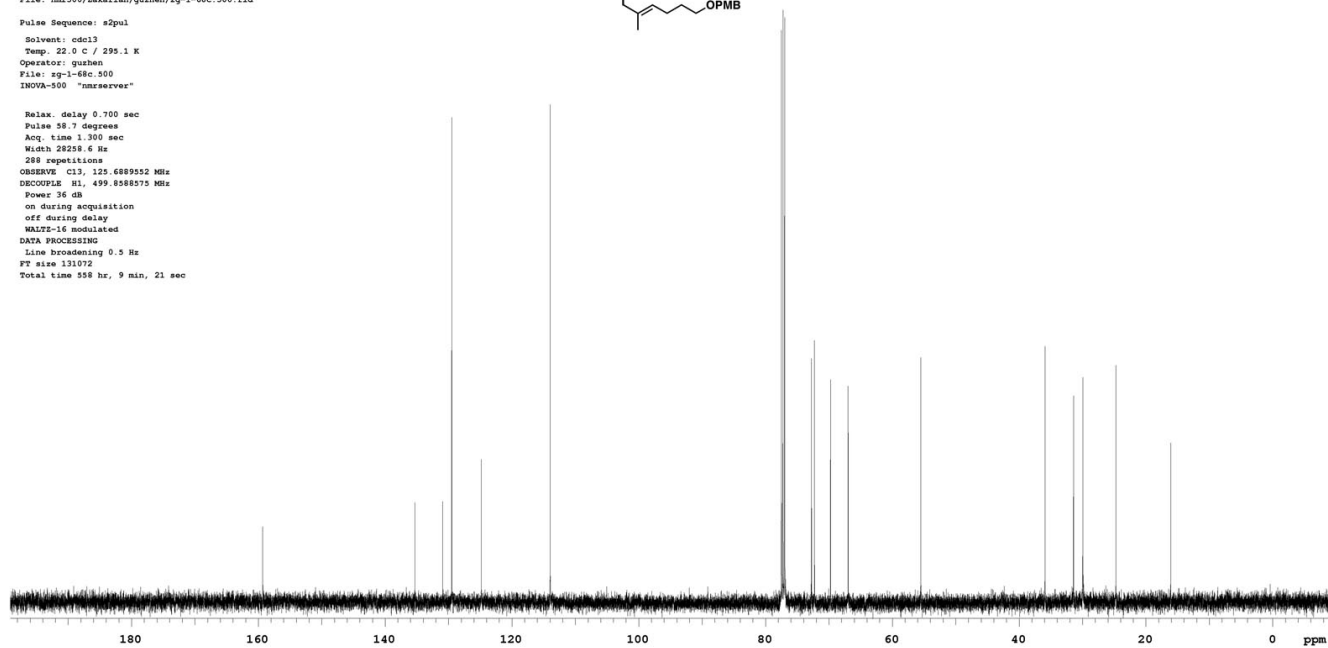

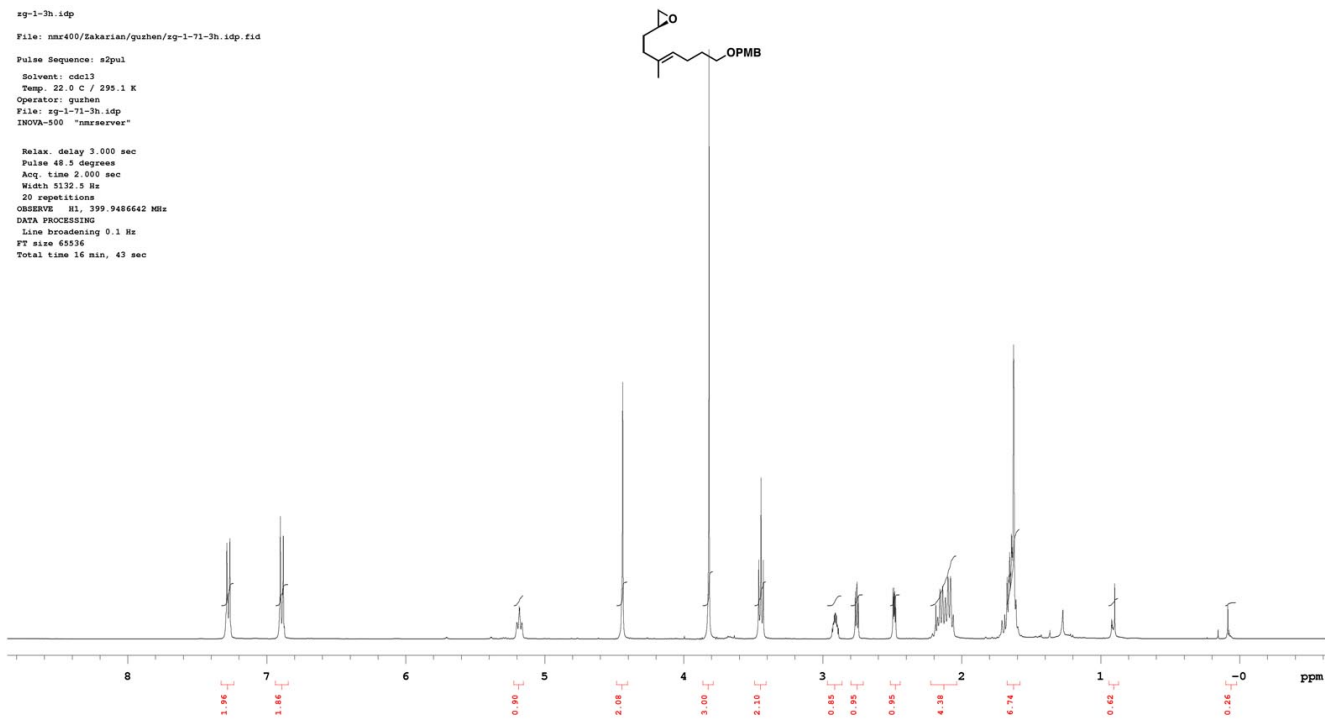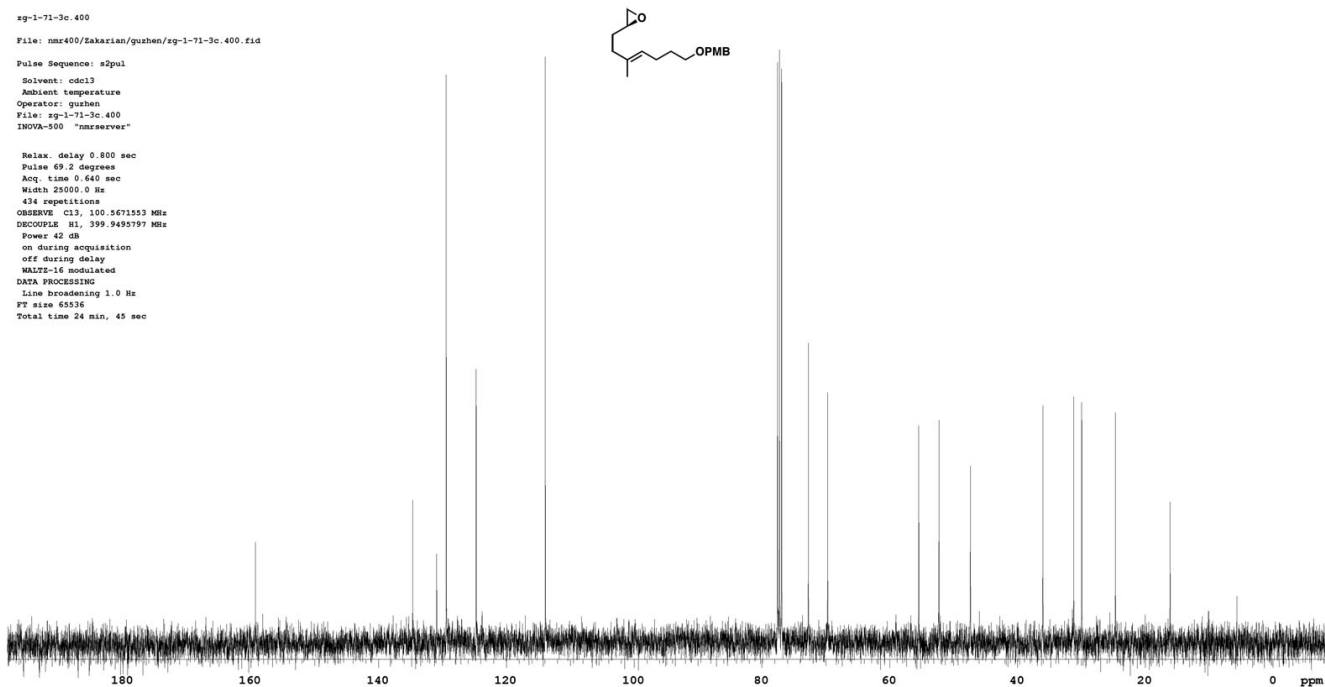

sg-1-243h.idp

File: nmr400/Zakarian/guzhen/sg-1-243h.fid

Pulse Sequence: s2pul

Solvent: cdcl3

Temp: 22.0 C / 295.1 K

Operator: guzhen

File: sg-1-243h.idp

INOVA-500 "nmrserver"

Relax. delay 3.000 sec  
 Pulse 48.5 degrees  
 Acq. time 2.000 sec  
 Width 5132.5 Hz  
 16 repetitions  
 OBSERVE H1, 399.9486576 MHz  
 DATA PROCESSING  
 Line broadening 0.1 Hz  
 FT size 65536  
 Total time 16 min, 43 sec

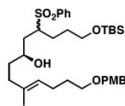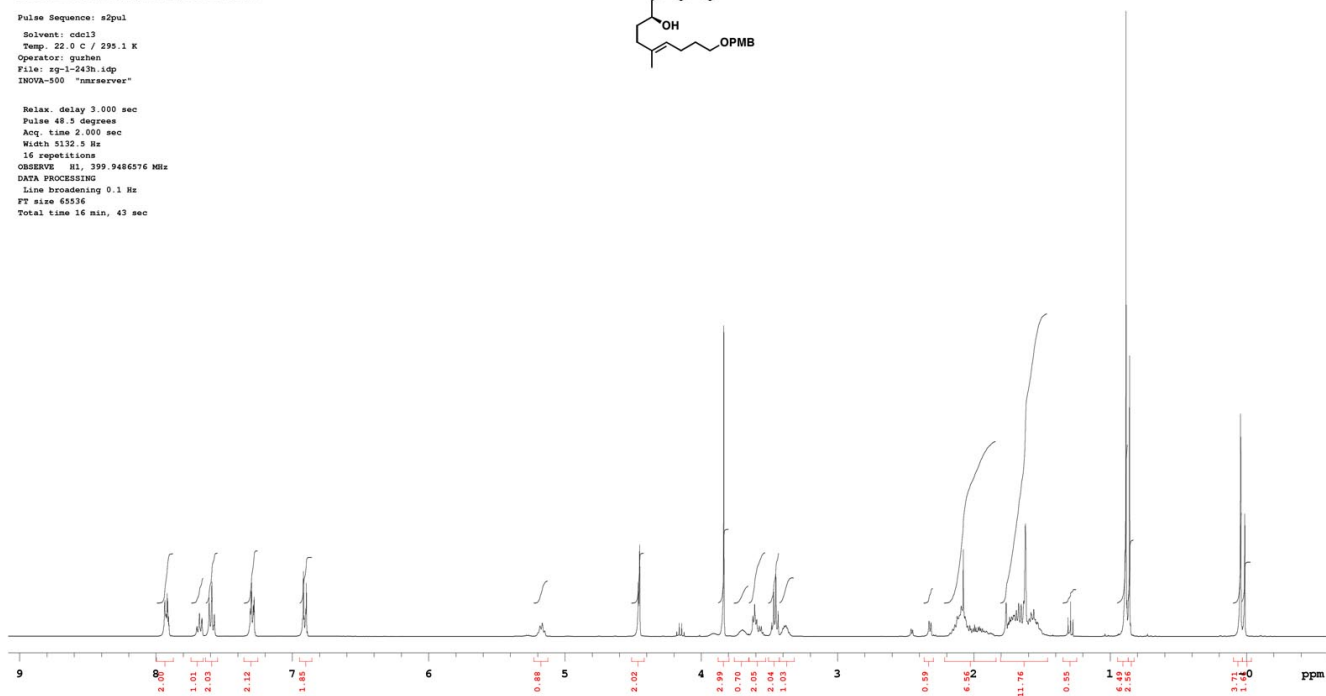

sg-1-222h.500

File: nmr500/Zakarian/guzhen/sg-1-222h.500.fid

Pulse Sequence: s2pul

Solvent: cdcl3

Temp: 22.0 C / 295.1 K

Operator: guzhen

File: sg-1-222h.500

INOVA-500 "nmrserver"

Relax. delay 2.000 sec  
 Pulse 26.8 degrees  
 Acq. time 2.668 sec  
 Width 5997.0 Hz  
 32 repetitions  
 OBSERVE H1, 499.8563514 MHz  
 DATA PROCESSING  
 Resol. enhancement -0.0 Hz  
 FT size 32768  
 Total time 2 min, 30 sec

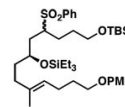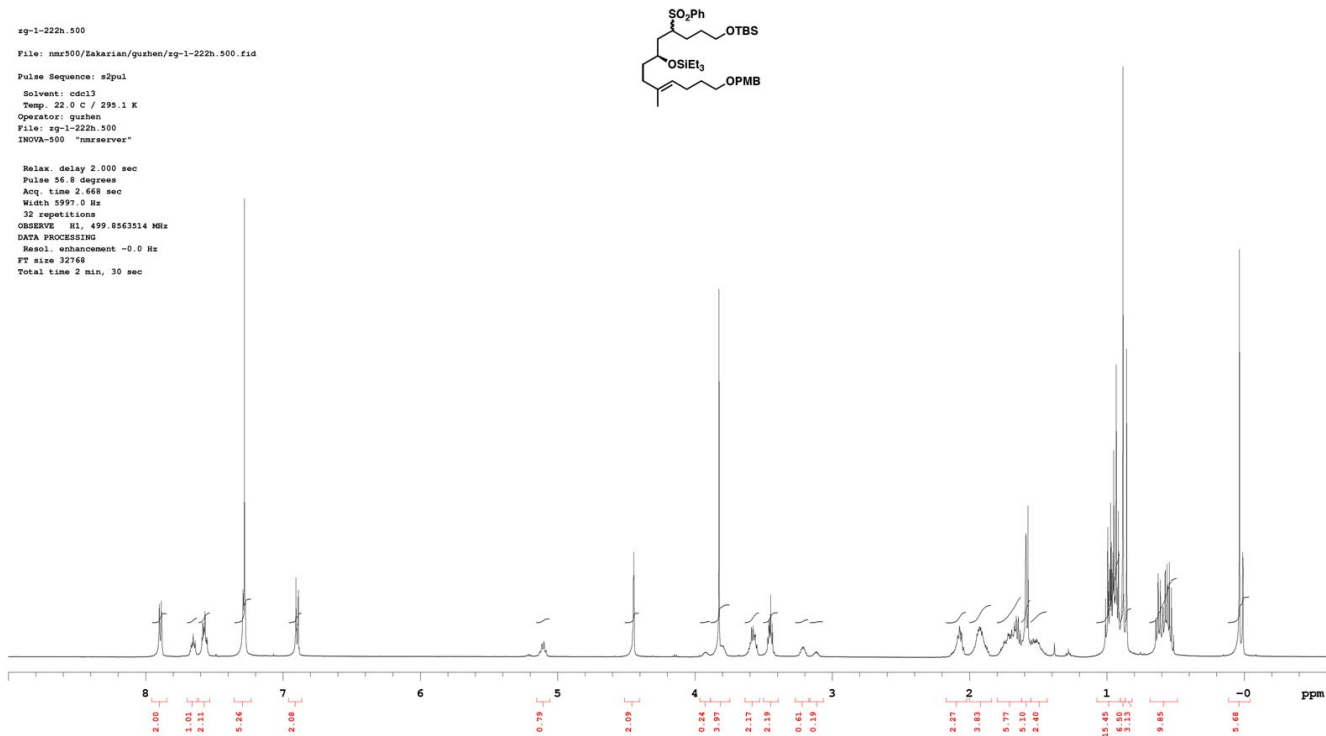

sg-1-145-1h.500

File: nmr500/Zakarian/guzhen/sg-1-145-1h.500.fid

Pulse Sequence: s2pul

Solvent: cdcl3

Temp: 22.0 C / 295.1 K

Operator: guzhen

File: sg-1-145-1h.500

INOVA-500 "nmrserver"

Relax. delay 2.000 sec  
 Pulse 56.8 degrees  
 Acq. time 2.668 sec  
 Width 5997.0 Hz  
 16 repetitions  
 OBSERVE H1, 499.8563514 MHz  
 DATA PROCESSING  
 Resol. enhancement -0.0 Hz  
 FT size 32768  
 Total time 2 min, 30 sec

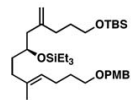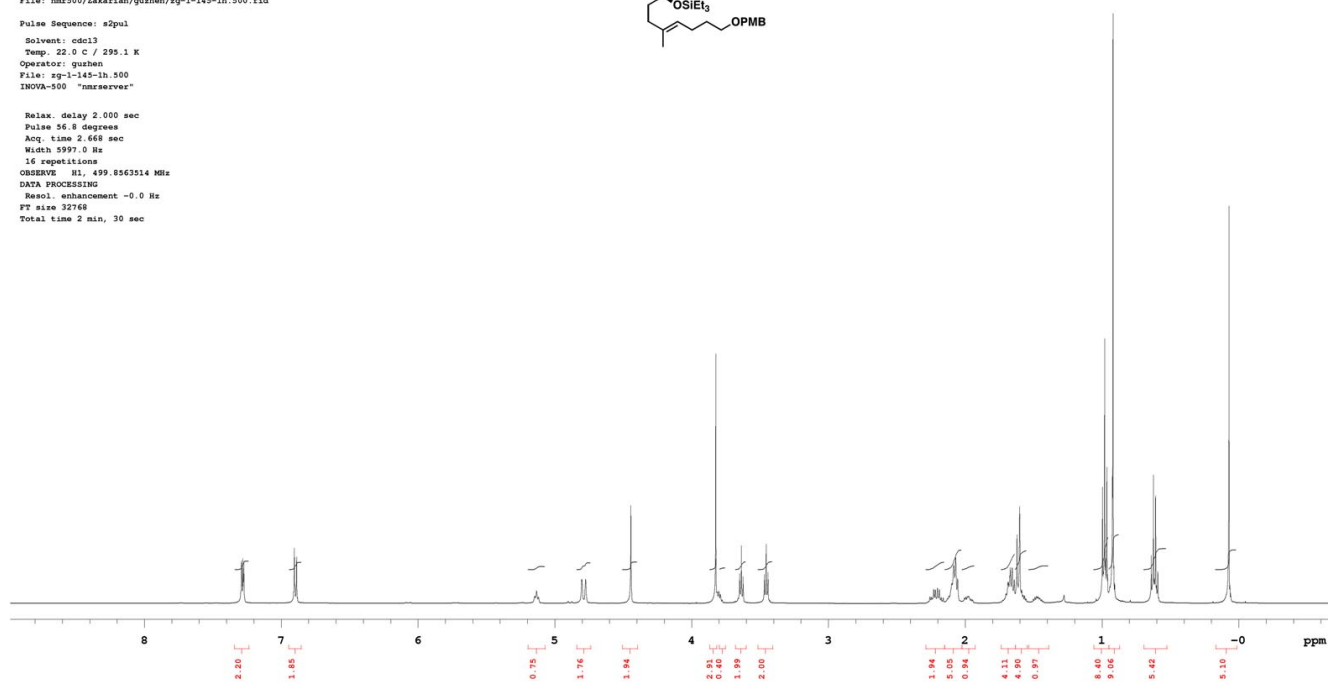

sg-1-145-1c.500

File: nmr500/Zakarian/guzhen/sg-1-145-1c.500.fid

Pulse Sequence: s2pul

Solvent: cdcl3

Temp: 22.0 C / 295.1 K

Operator: guzhen

File: sg-1-145-1c.500

INOVA-500 "nmrserver"

Relax. delay 1.200 sec  
 Pulse 25.7 degrees  
 Acq. time 1.300 sec  
 Width 28258.6 Hz  
 459 repetitions  
 OBSERVE C13, 125.6889543 MHz  
 DECOUPLE H1, 499.8588575 MHz  
 Power 36 dB  
 on during acquisition  
 off during delay  
 WALTZ-16 modulated  
 DATA PROCESSING  
 Line broadening 0.5 Hz  
 FT size 131072  
 Total time 697 hr, 2 min, 41 sec

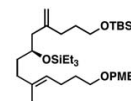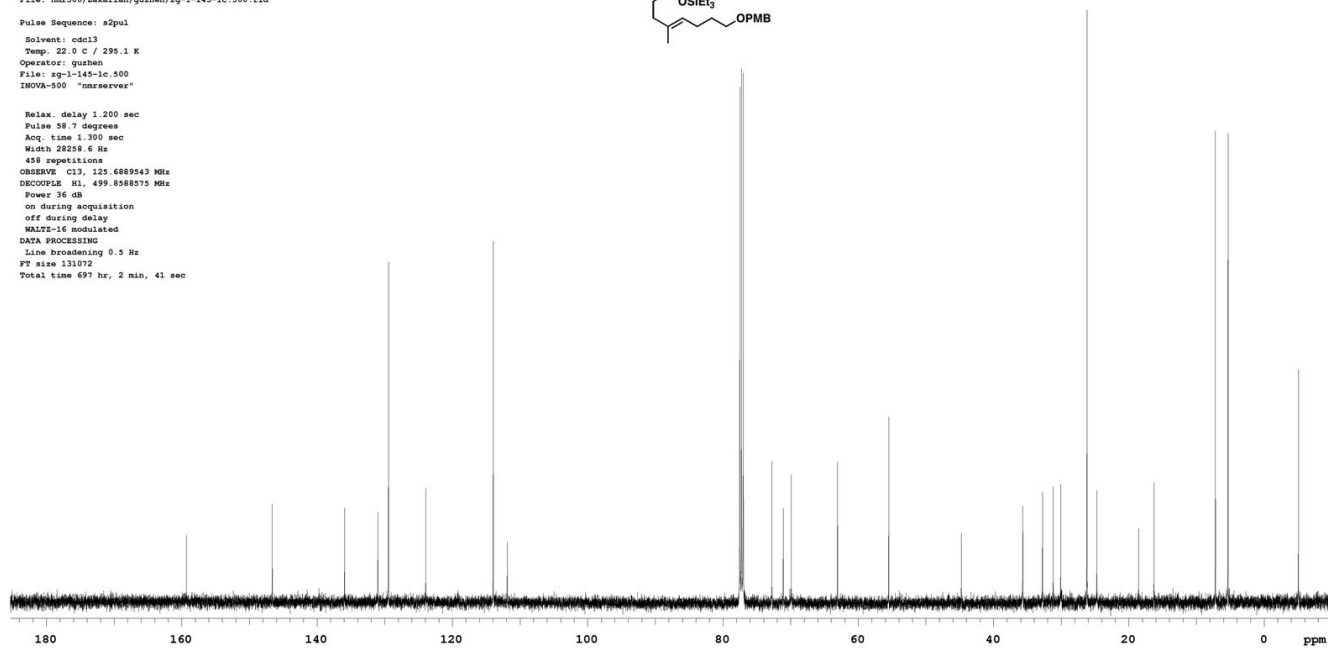

zg-1-163-1h.500

File: nmr500/Zakarian/guzhen/zg-1-163-1h.500.fid

Pulse Sequence: s2pul

Solvent: cdcl3  
 Temp. 22.0 C / 295.1 K  
 Operator: guzhen  
 File: zg-1-163-1h.500  
 INOVA-500 "rabi.chem.ucsb.edu"

Relax. delay 2.000 sec  
 Pulse 56.8 degrees  
 Acq. time 2.668 sec  
 Width 5997.0 Hz  
 13 repetitions  
 OBSERVE H1, 499.8563614 MHz  
 DATA PROCESSING  
 Resol. enhancement -0.0 Hz  
 FT size 32768  
 Total time 2 min, 30 sec

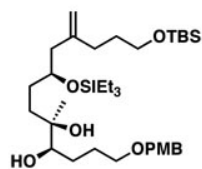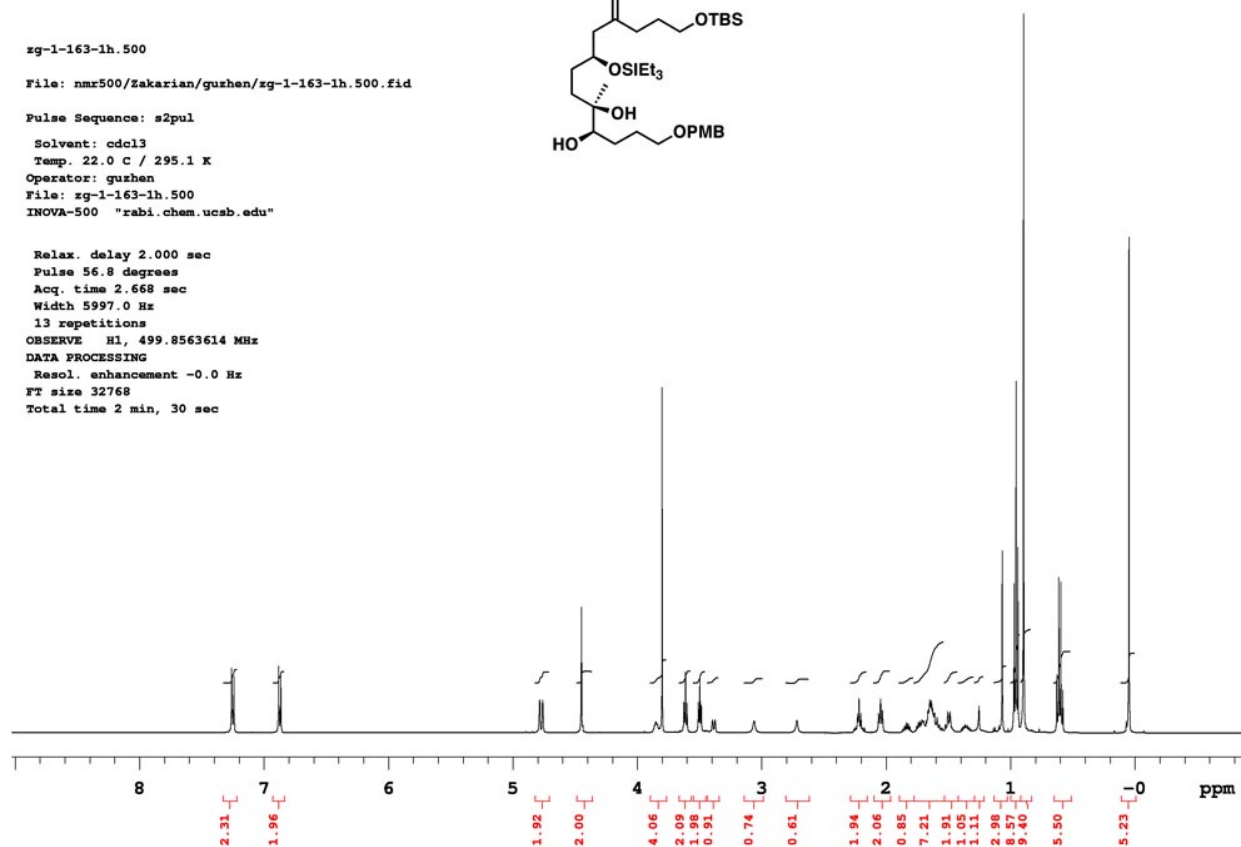

zg-1-163-1c.500

File: nmr500/Zakarian/guzhen/zg-1-163-1c.500.fid

Pulse Sequence: s2pul

Solvent: cdcl3  
 Temp. 22.0 C / 295.1 K  
 Operator: guzhen  
 File: zg-1-163-1c.500  
 INOVA-500 "nmrserver"

Relax. delay 1.000 sec  
 Pulse 59.7 degrees  
 Acq. time 1.300 sec  
 Width 28255.4 Hz  
 660 repetitions  
 OBSERVE C13, 125.6889552 MHz  
 DECOUPLE H1, 499.8588575 MHz  
 Power 36 dB  
 on during acquisition  
 off during delay  
 WALTZ-16 modulated  
 DATA PROCESSING  
 Line broadening 0.5 Hz  
 FT size 131072  
 Total time 641 hr, 29 min, 21 sec

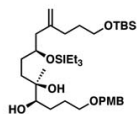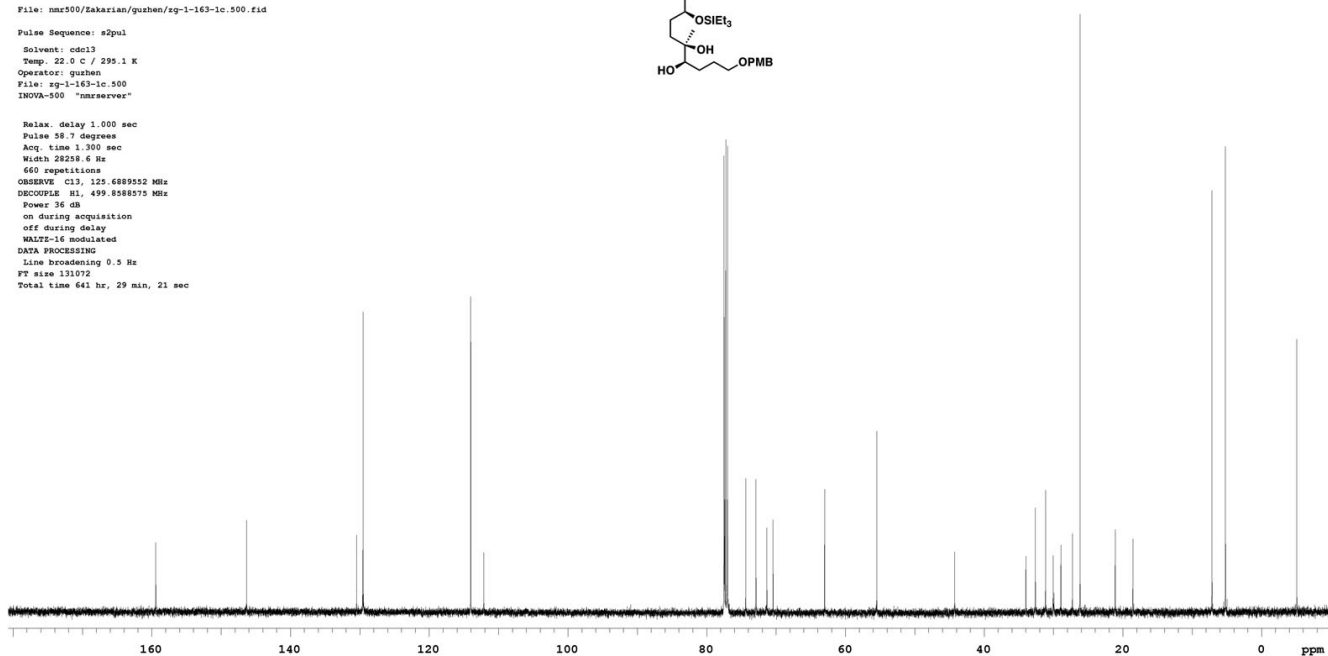

sg-1-188-1h.500

File: nmr500/Zakarian/guzhen/sg-1-188-1h.500.fid

Pulse Sequence: s2pul

Solvent: cdcl3

Temp: 22.0 C / 295.1 K

Operator: guzhen

File: sg-1-188-1h.500

INOVA-500 "nmrserver"

Relax. delay 2.000 sec

Pulse 56.8 degrees

Acq. time 2.668 sec

Width 5997.0 Hz

21 repetitions

OBSERVE H1, 499.8563513 MHz

DATA PROCESSING

Resol. enhancement -0.0 Hz

FT size 32768

Total time 2 min, 30 sec

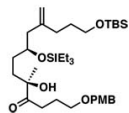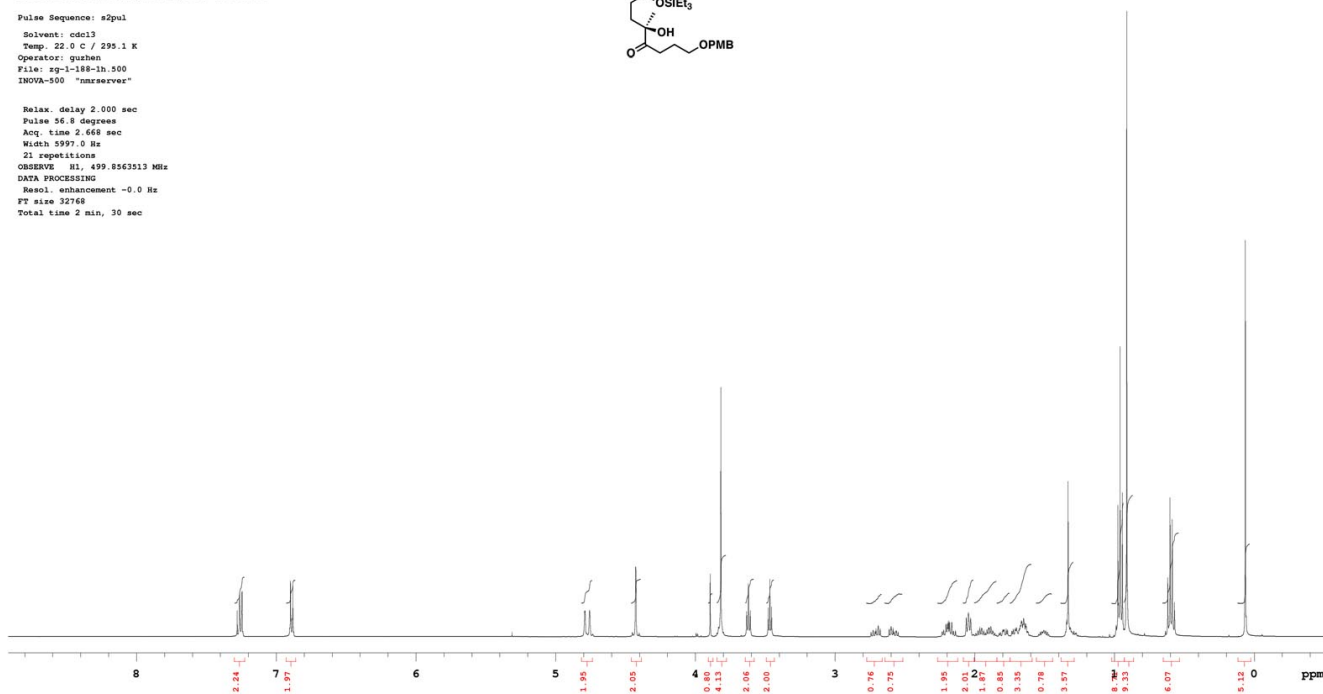

sg-1-188-1c.500

File: nmr500/Zakarian/guzhen/sg-1-188-1c.500.fid

Pulse Sequence: s2pul

Solvent: cdcl3

Temp: 22.0 C / 295.1 K

Operator: guzhen

File: sg-1-188-1c.500

INOVA-500 "nmrserver"

Relax. delay 1.500 sec

Pulse 28.7 degrees

Acq. time 1.300 sec

Width 29996.3 Hz

212 repetitions

OBSERVE C13, 125.6889552 MHz

DECOUPLE H1, 499.8588575 MHz

Power 36 dB

on during acquisition

off during delay

WALTZ-16 modulated

DATA PROCESSING

Line broadening 0.5 Hz

FT size 131072

Total time 780 hr, 22 min, 49 sec

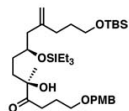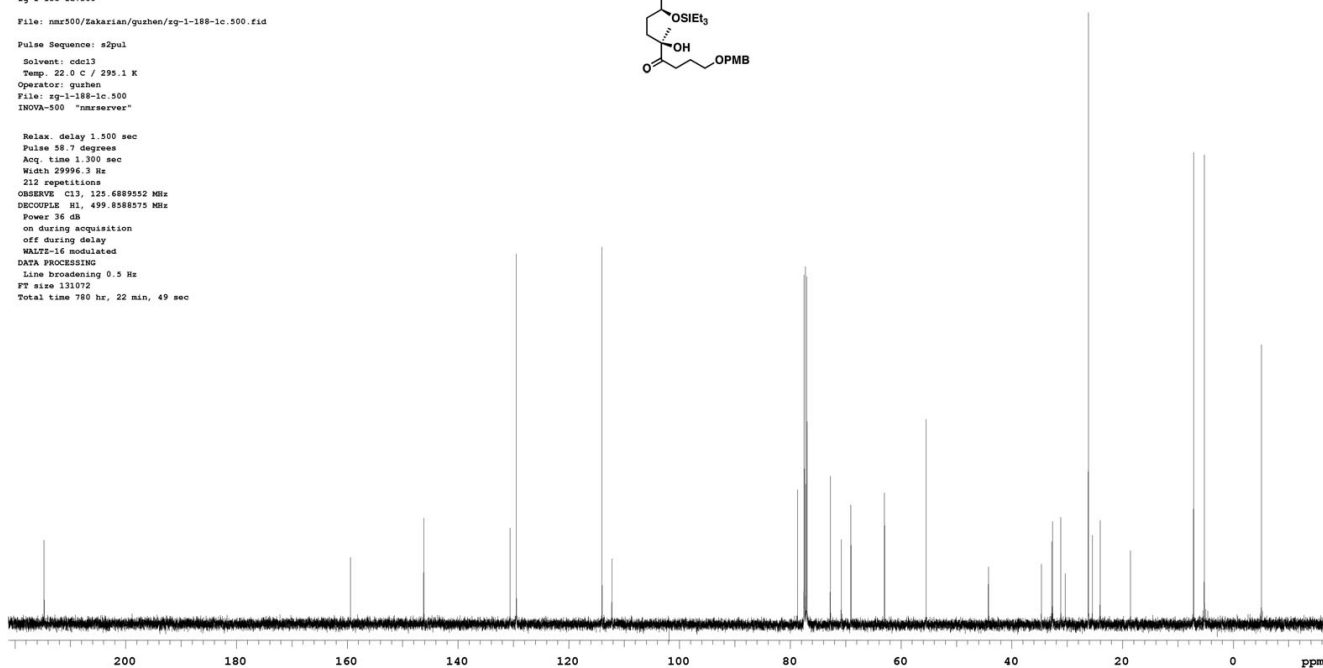



sg-1-190h.500

File: nmr500/Zakarian/guzhen/sg-1-190h.500.fid

Pulse Sequence: s2pul  
 Solvent: cdcl3  
 Temp: 22.0 C / 295.1 K  
 Operator: guzhen  
 File: sg-1-190h.500  
 INOVA-500 "nmrserver"

Relax. delay 2.000 sec  
 Pulse 56.8 degrees  
 Acq. time 2.668 sec  
 Width 5997.0 Hz  
 16 repetitions  
 OBSERVE H1, 499.8563499 MHz  
 DATA PROCESSING  
 Resol. enhancement -0.0 Hz  
 FT size 32768  
 Total time 2 min, 30 sec

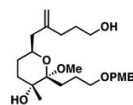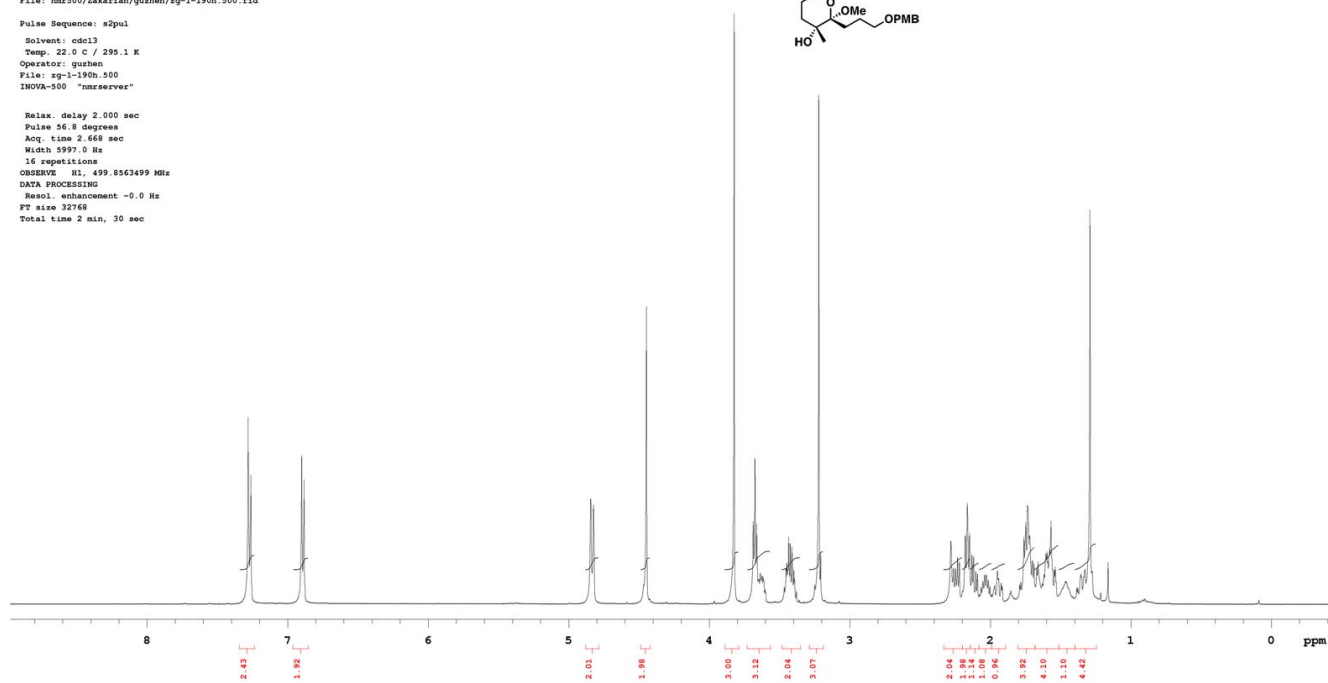

sg-1-190c.500

File: nmr500/Zakarian/guzhen/sg-1-190c.500.fid

Pulse Sequence: s2pul  
 Solvent: cdcl3  
 Temp: 22.0 C / 295.1 K  
 Operator: guzhen  
 File: sg-1-190c.500  
 INOVA-500 "nmrserver"

Relax. delay 0.800 sec  
 Pulse 28.7 degrees  
 Acq. time 1.300 sec  
 Width 28258.6 Hz  
 1144 repetitions  
 OBSERVE C13, 125.6889547 MHz  
 DECOUPLE H1, 499.8588575 MHz  
 Power 36 dB  
 on during acquisition  
 off during delay  
 WALTZ-16 modulated  
 DATA PROCESSING  
 Line broadening 0.5 Hz  
 FT size 131072  
 Total time 585 hr, 56 min, 1 sec

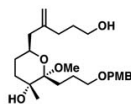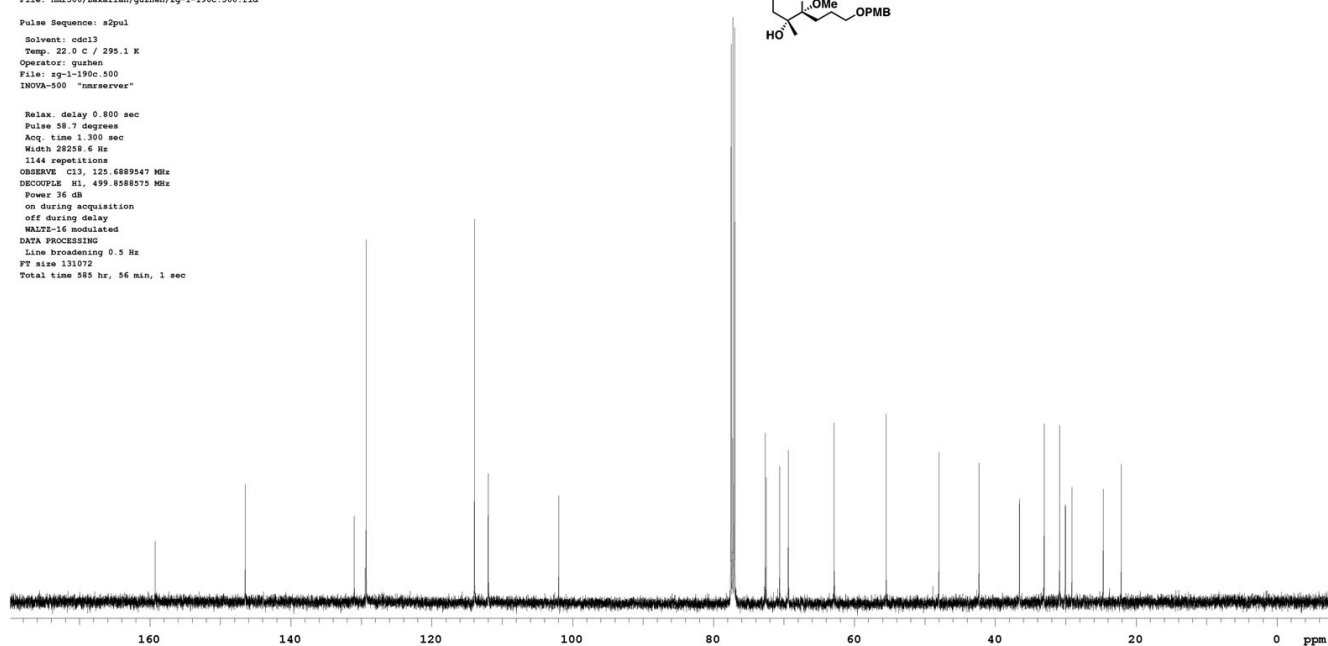

sg-1-292h.500

File: nmr500/Zakarian/guzhen/sg-1-292h.500.fid

Pulse Sequence: s2pul

Solvent: cdcl3

Temp: 22.0 C / 295.1 K

Operator: guzhen

File: sg-1-292h.500

INOVA-500 "nmrserver"

Relax. delay 2.000 sec

Pulse 56.8 degrees

Acq. time 2.668 sec

Width 5997.0 Hz

17 repetitions

OBSERVE H1, 499.856325 MHz

DATA PROCESSING

Resol. enhancement 0.0 Hz

FT size 32768

Total time 4 min, 59 sec

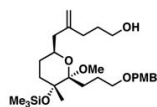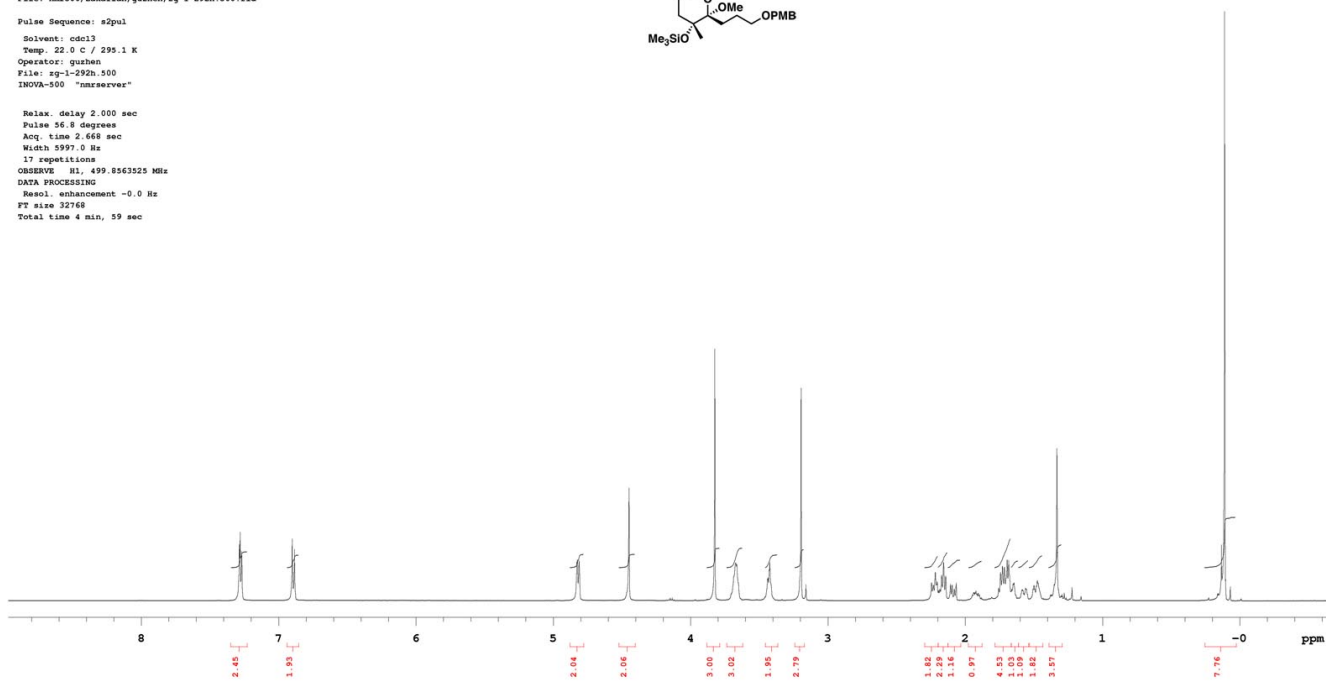

sg-1-292c.500

File: nmr500/Zakarian/guzhen/sg-1-292c.500.fid

Pulse Sequence: s2pul

Solvent: cdcl3

Temp: 22.0 C / 295.1 K

Operator: guzhen

File: sg-1-292c.500

INOVA-500 "nmrserver"

Relax. delay 1.000 sec

Pulse 25.7 degrees

Acq. time 1.300 sec

Width 28258.6 Hz

436 repetitions

OBSERVE C13, 125.6889547 MHz

DECOUPLE H1, 499.8588575 MHz

Power 36 dB

on during acquisition

off during delay

WALTZ-16 modulated

DATA PROCESSING

Line broadening 0.5 Hz

FT size 131072

Total time 641 hr, 29 min, 21 sec

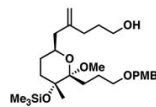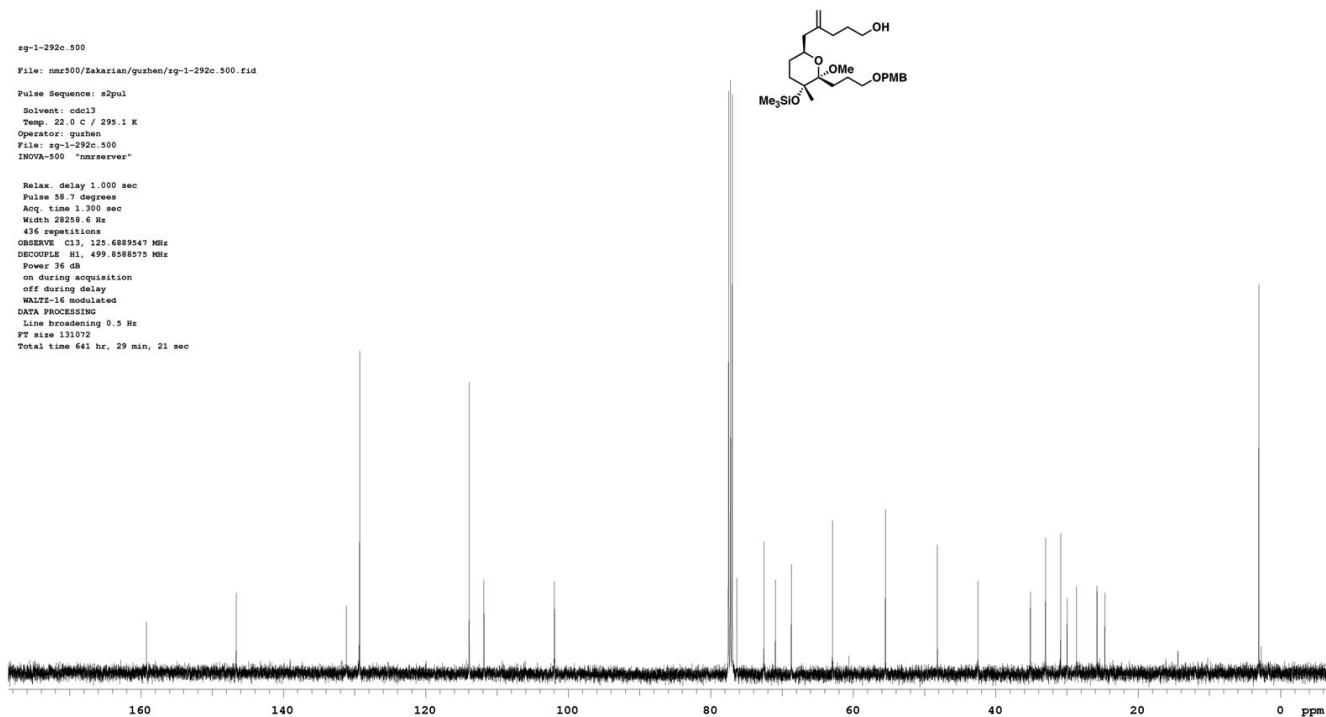

sg-1-228h.500

File: nmr500/Zakarian/guzhen/sg-1-228h.500.fid

Pulse Sequence: s2pul  
 Solvent: cdcl3  
 Temp: 22.0 C / 295.1 K  
 Operator: guzhen  
 File: sg-1-228h.500  
 INOVA-500 "nmrserver"

Relax. delay 3.000 sec  
 Pulse 81.1 degrees  
 Acq. time 2.732 sec  
 Width 5997.0 Hz  
 16 repetitions  
 OBSERVE H1, 499.8563515 MHz  
 DATA PROCESSING  
 Resol. enhancement -0.0 Hz  
 FT size 32768  
 Total time 6 min, 7 sec

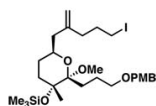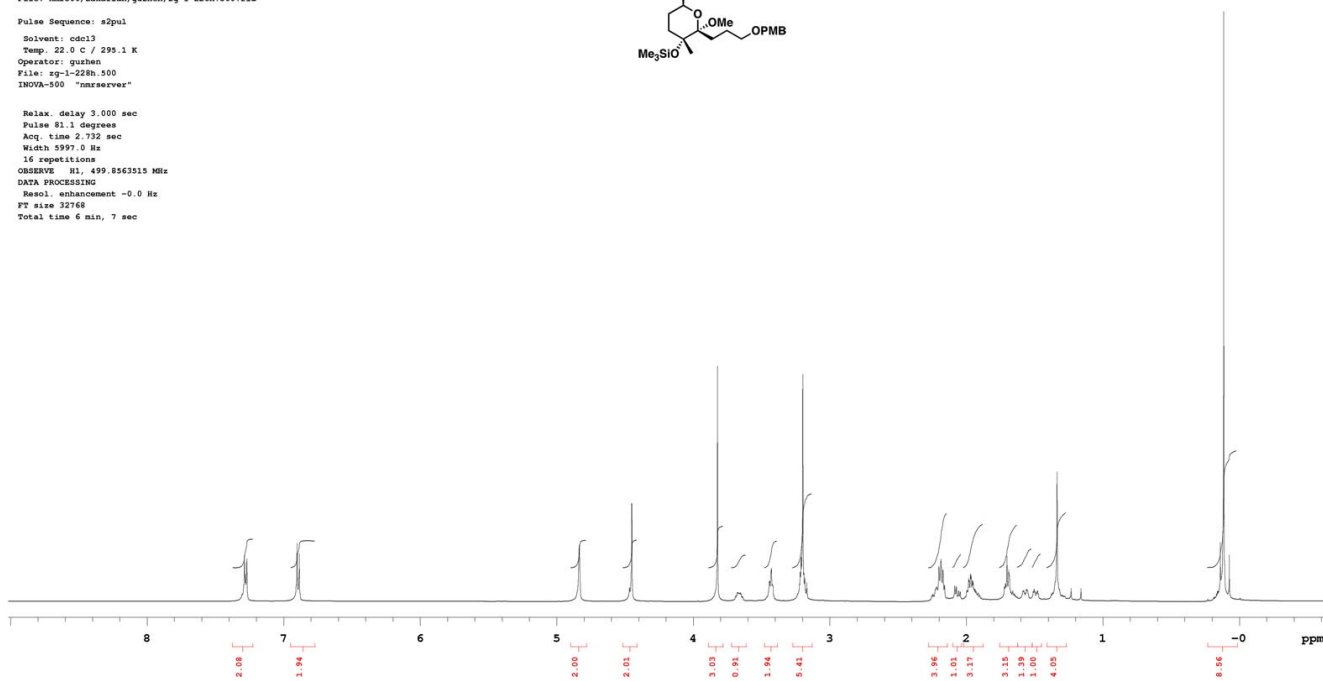

sg-1-228c.500

File: nmr500/Zakarian/guzhen/sg-1-228c.500.fid

Pulse Sequence: s2pul  
 Solvent: cdcl3  
 Temp: 22.0 C / 295.1 K  
 Operator: guzhen  
 File: sg-1-228c.500  
 INOVA-500 "nmrserver"

Relax. delay 1.000 sec  
 Pulse 81.7 degrees  
 Acq. time 1.300 sec  
 Width 28258.6 Hz  
 220 repetitions  
 OBSERVE C13, 125.6889582 MHz  
 DECOUPLE H1, 499.8588575 MHz  
 Power 36 dB  
 on during acquisition  
 off during delay  
 WALTZ-16 modulated  
 DATA PROCESSING  
 Line broadening 0.5 Hz  
 FT size 131072  
 Total time 641 hr, 29 min, 21 sec

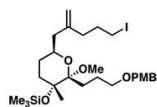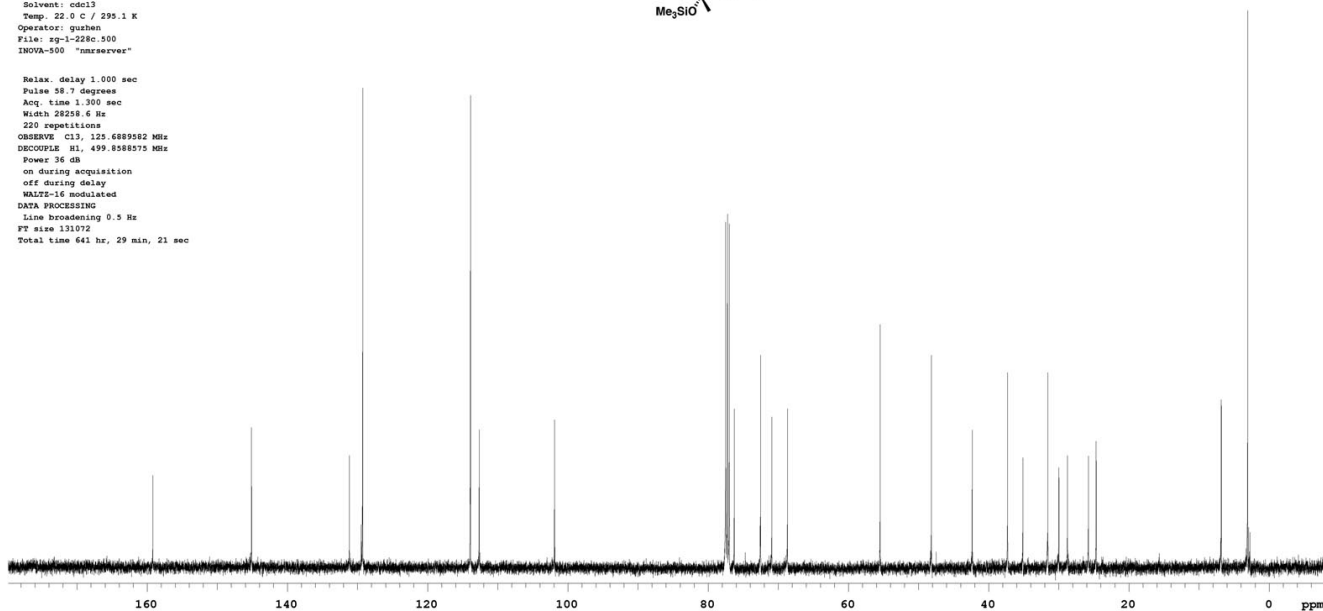

zg-5-279.swp

File: nmr500/Zakarian/guzhen/zg-5-279.swp.fid

Pulse Sequence: s2pul

Solvent: CDCl3  
 Ambient temperature  
 Operator: guzhen  
 File: zg-5-279.swp  
 INOVA-500 "rabi.chem.ucsb.edu"

Relax. delay 8.000 sec  
 Pulse 75.0 degrees  
 Acq. time 2.500 sec  
 Width 8503.4 Hz  
 8 repetitions  
 OBSERVE H1, 499.8560514 MHz  
 DATA PROCESSING  
 Line broadening 0.2 Hz  
 FT size 32768  
 Total time 1 min, 24 sec

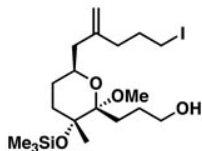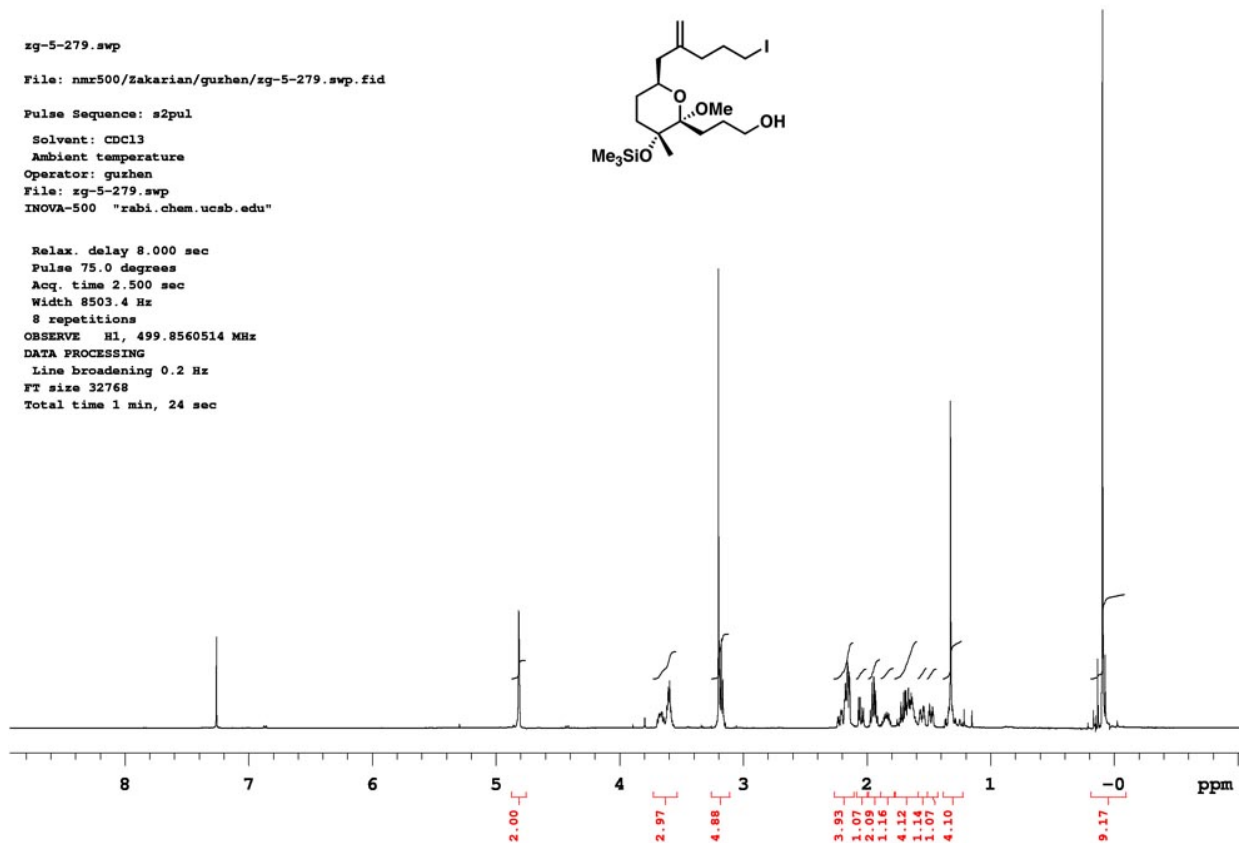

zg-5-279-13C.swp

File: nmr500/Zakarian/guzhen/zg-5-279-13C.swp.fid

Pulse Sequence: s2pul

Solvent: cdcl3  
 Ambient temperature  
 Operator: guzhen  
 File: zg-5-279-13C.swp  
 INOVA-500 "rabi.chem.ucsb.edu"

Relax. delay 1.000 sec  
 Pulse 43.2 degrees  
 Acq. time 1.303 sec  
 Width 30165.9 Hz  
 118 repetitions  
 OBSERVE C13, 125.6888769 MHz  
 DECOUPLE H1, 499.8585468 MHz  
 Power 38 dB  
 continuously on  
 WALTZ-16 modulated  
 DATA PROCESSING  
 Line broadening 0.5 Hz  
 FT size 131072  
 Total time 6 hr, 25 min, 20 sec

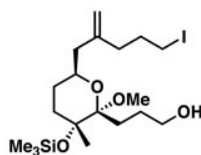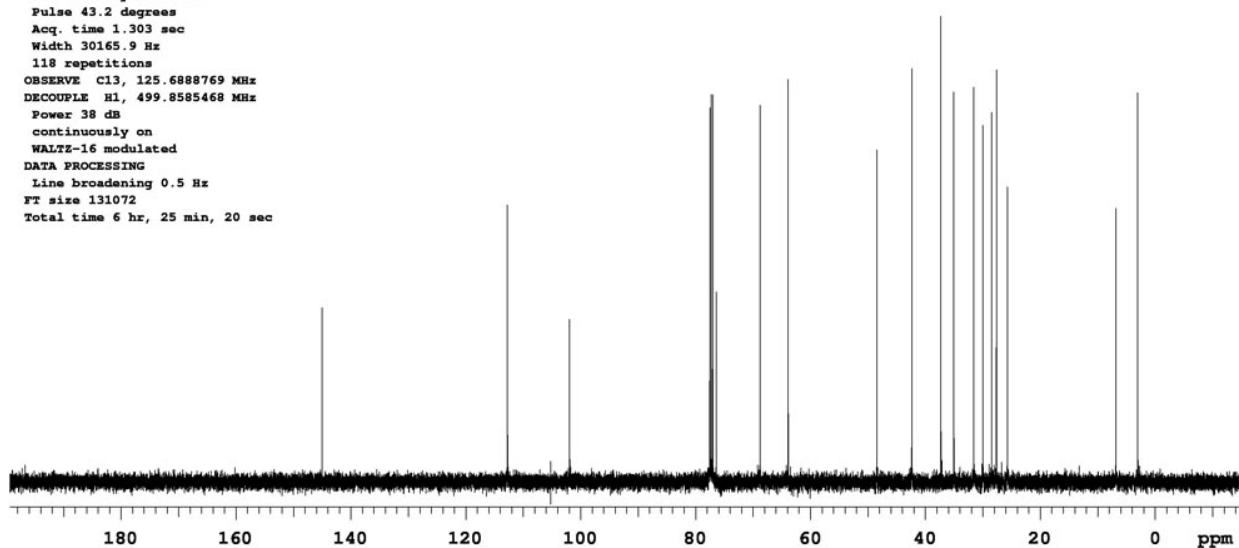

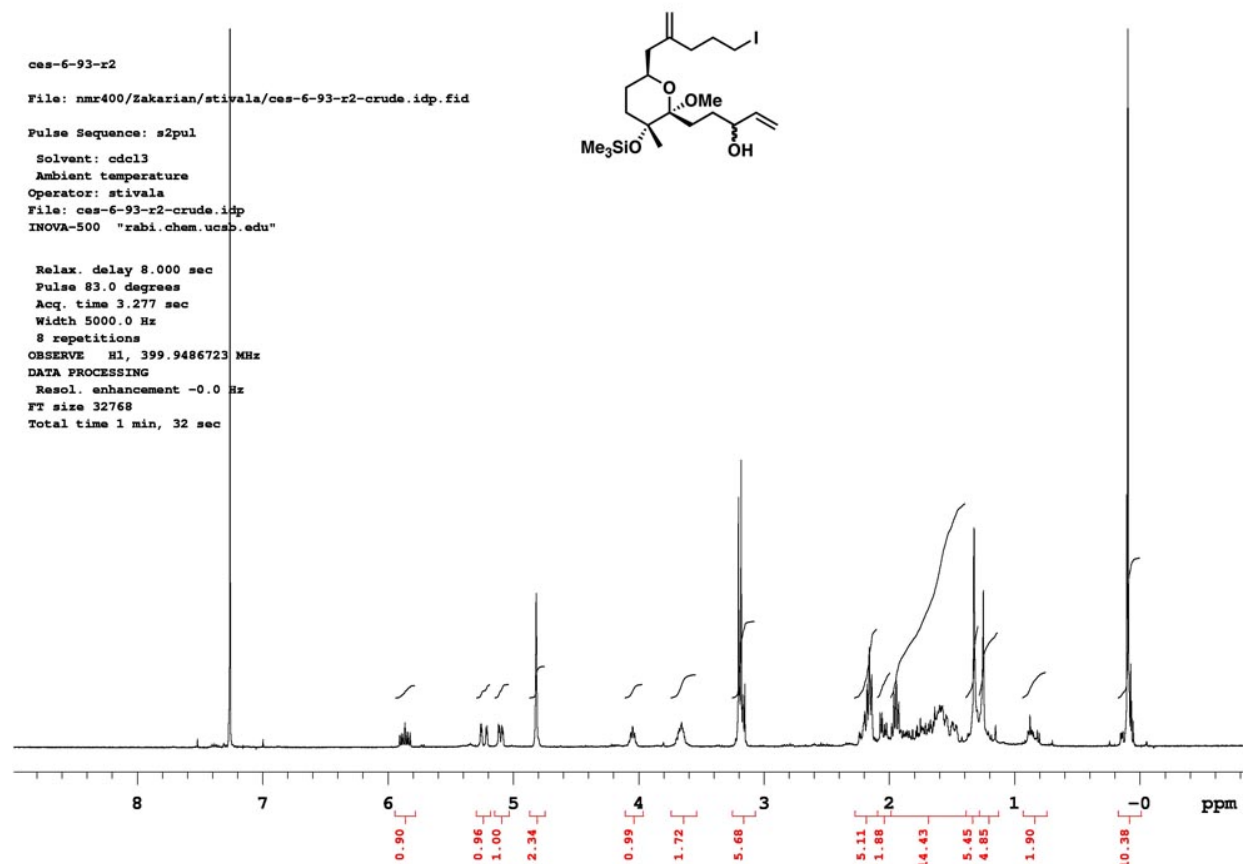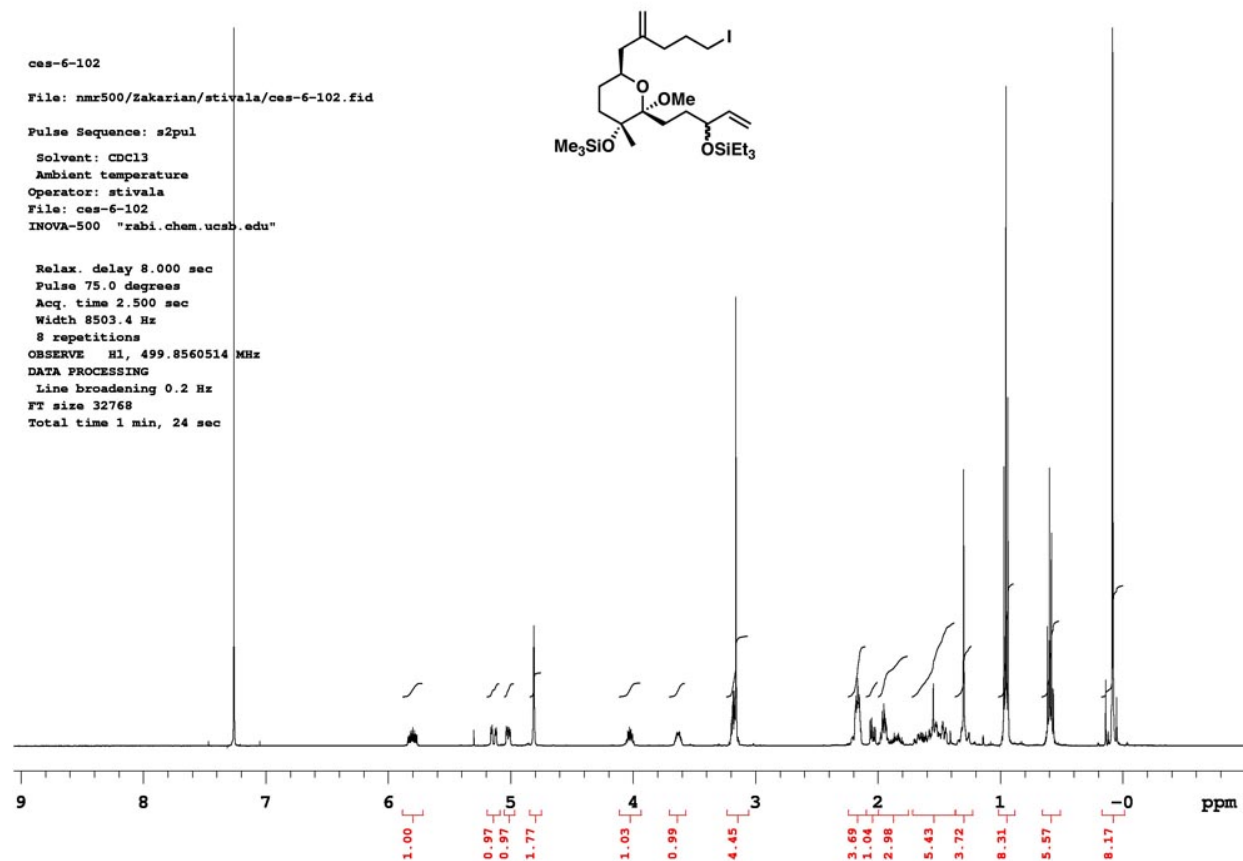

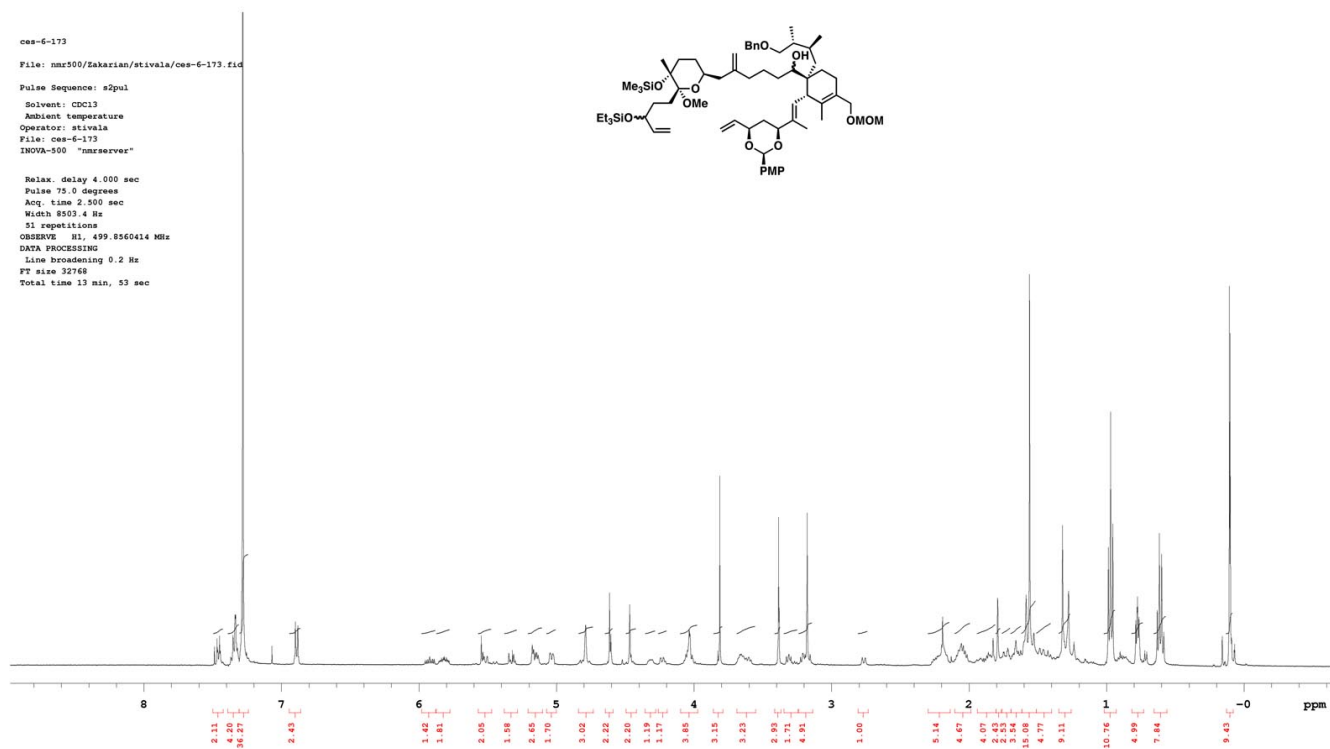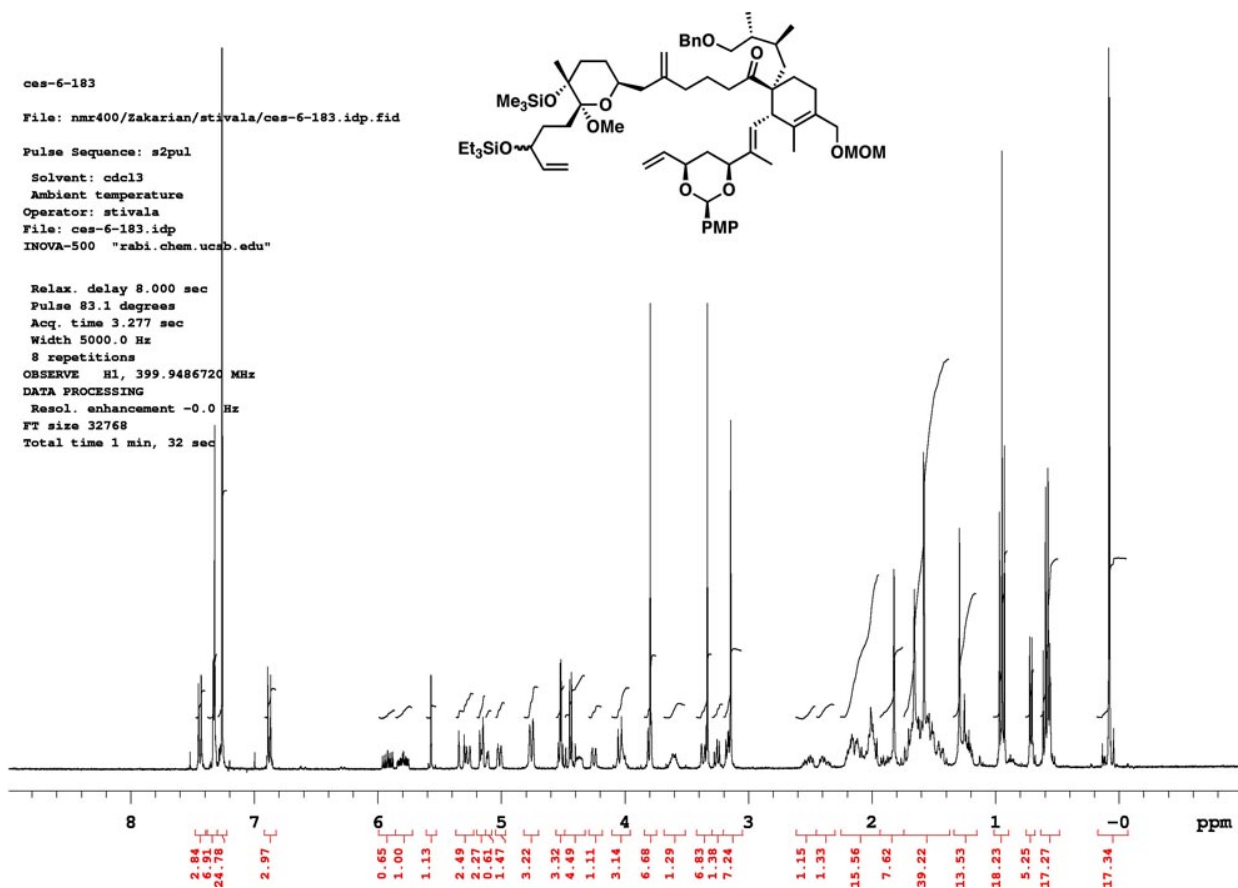

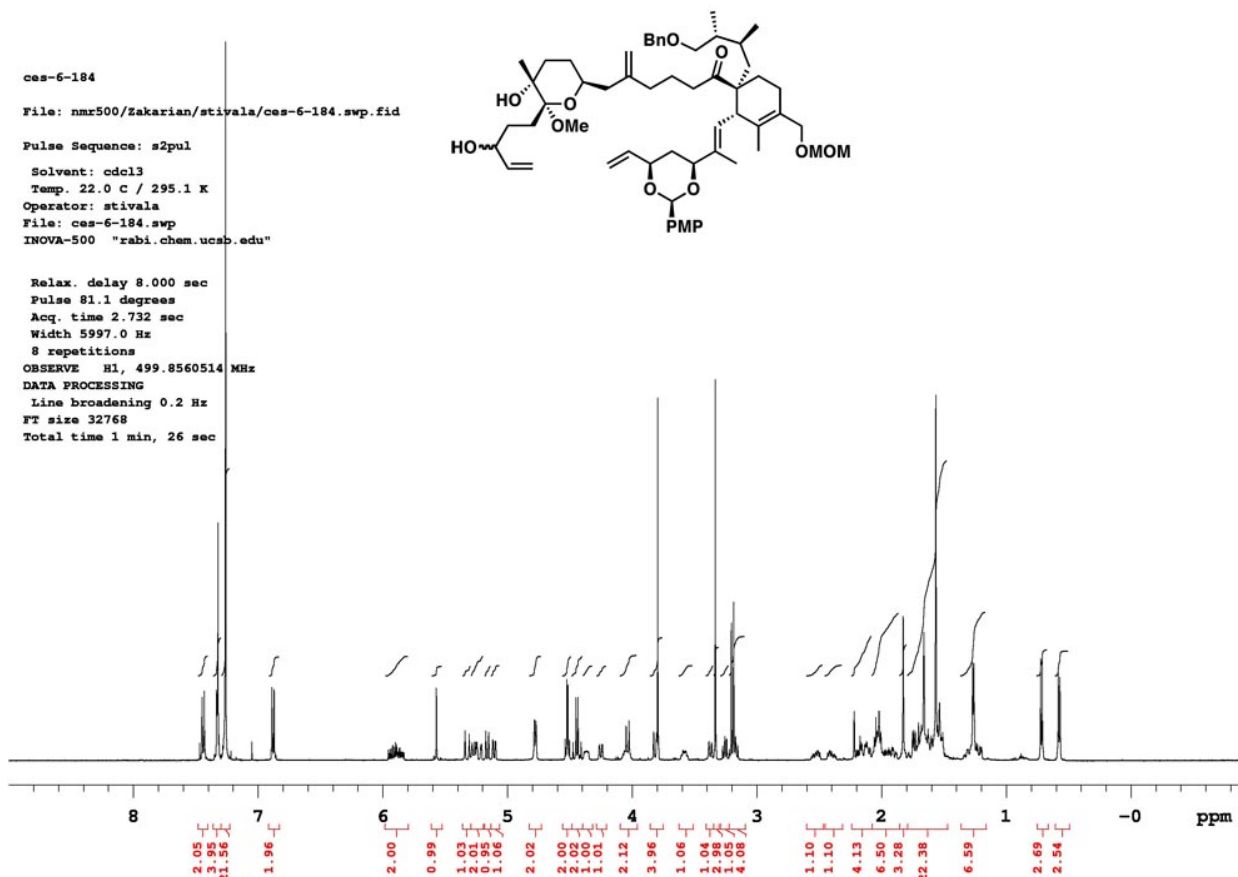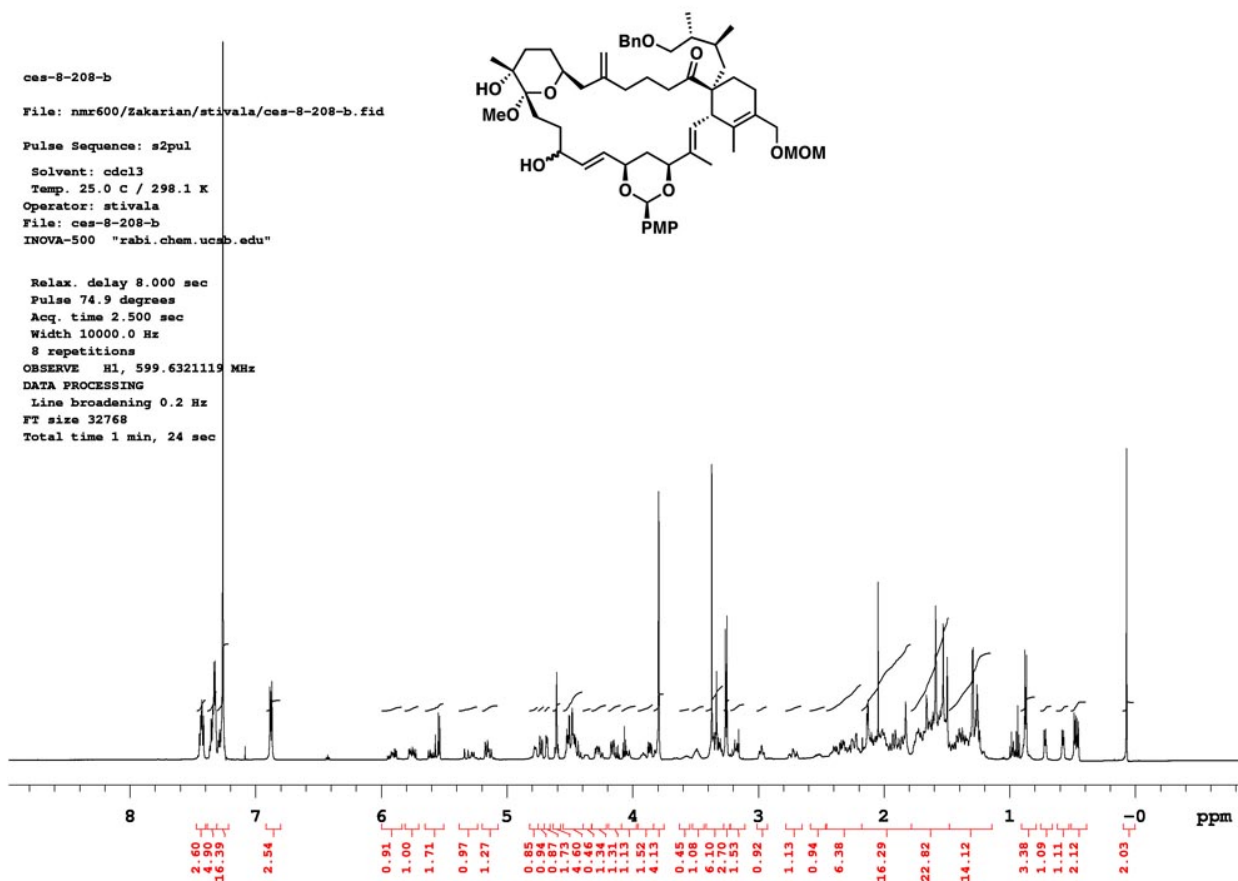





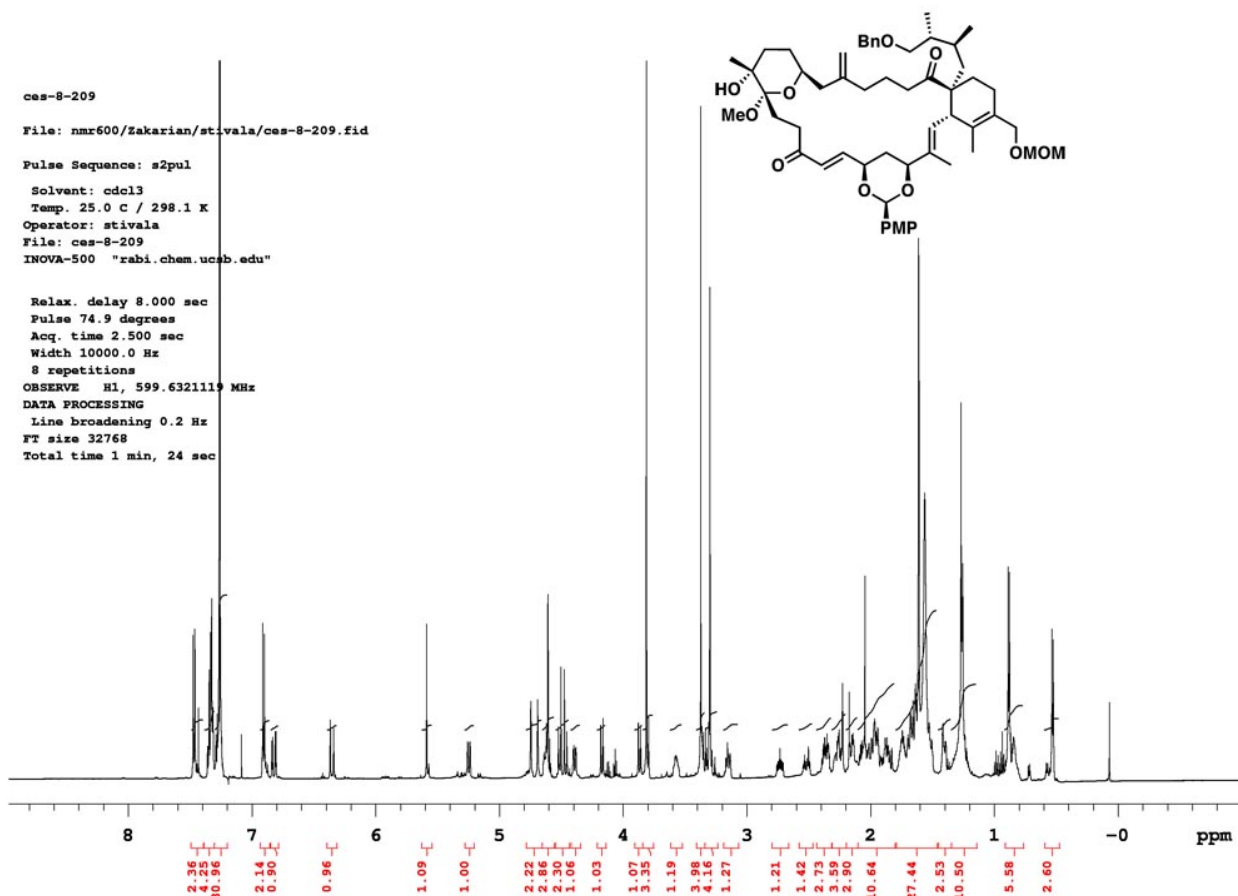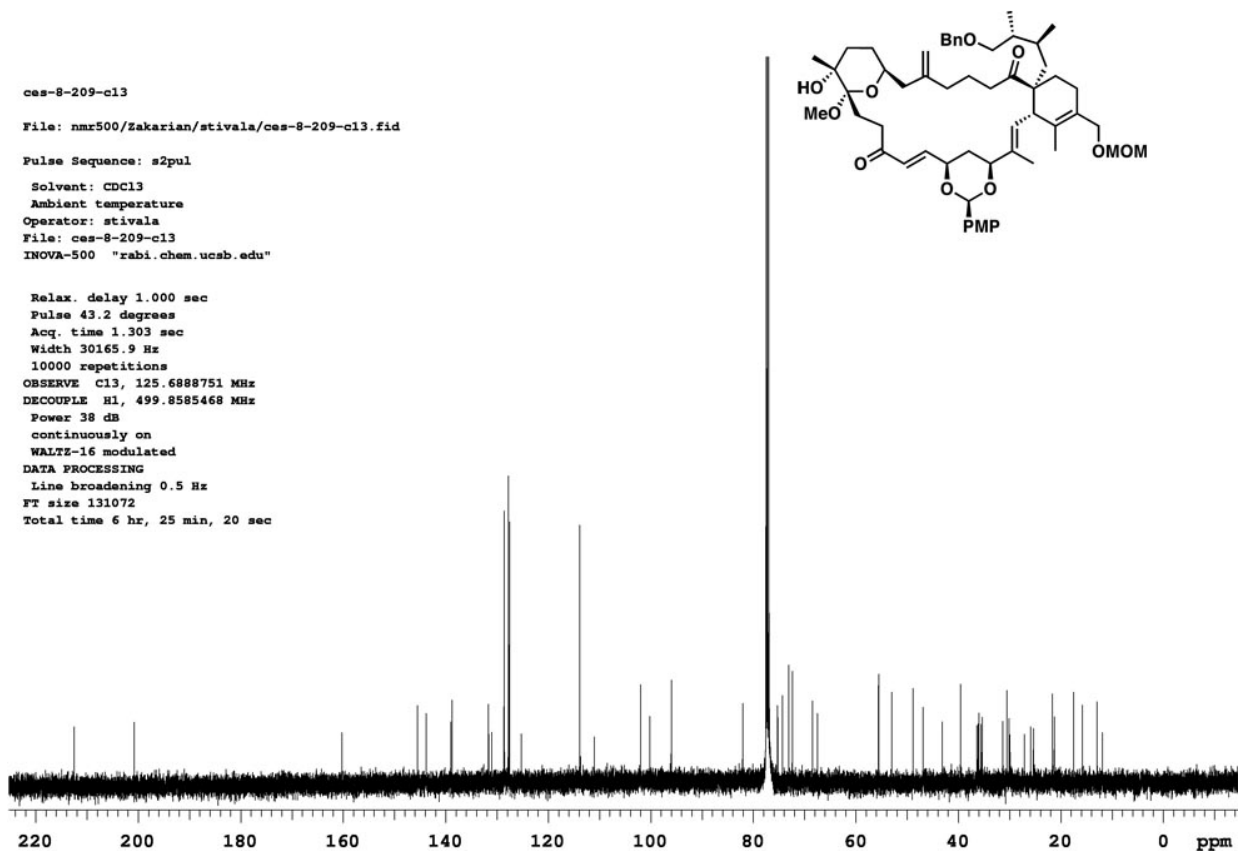

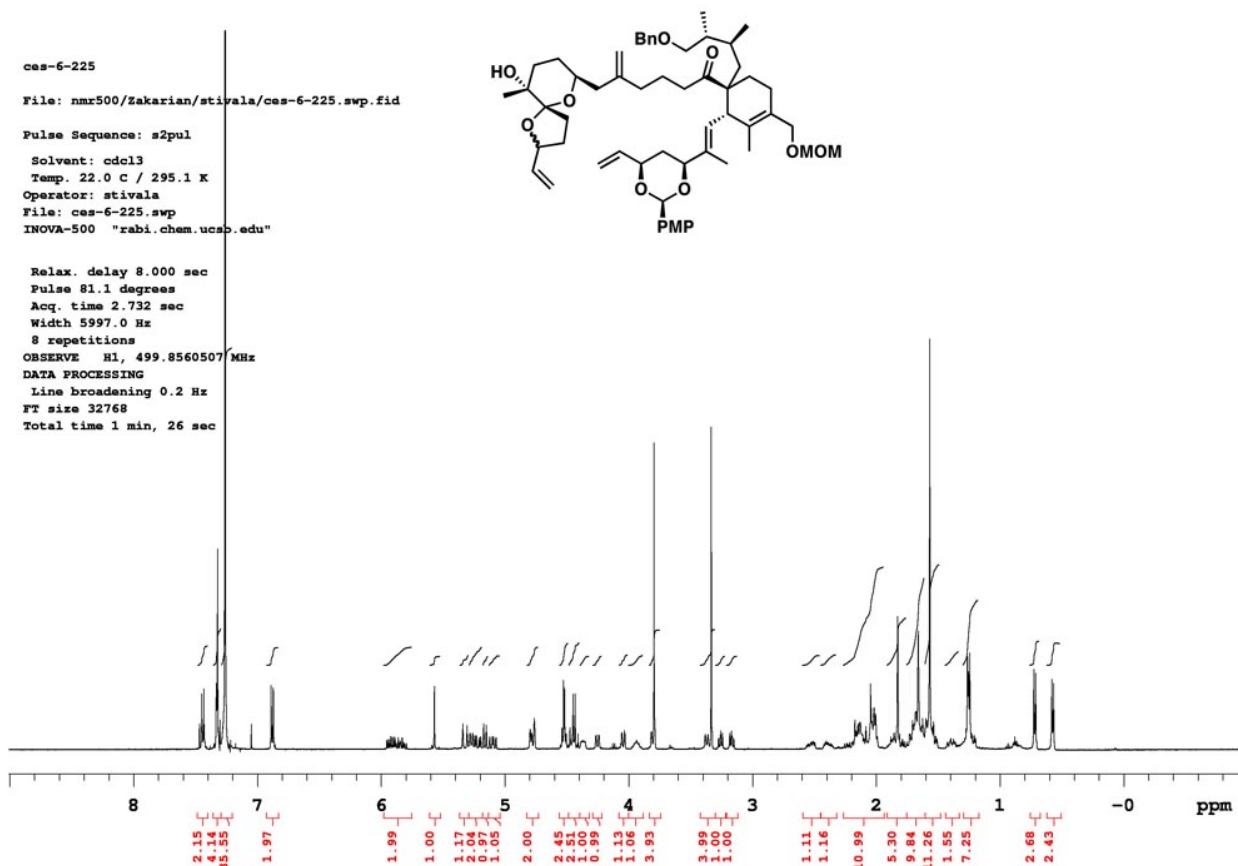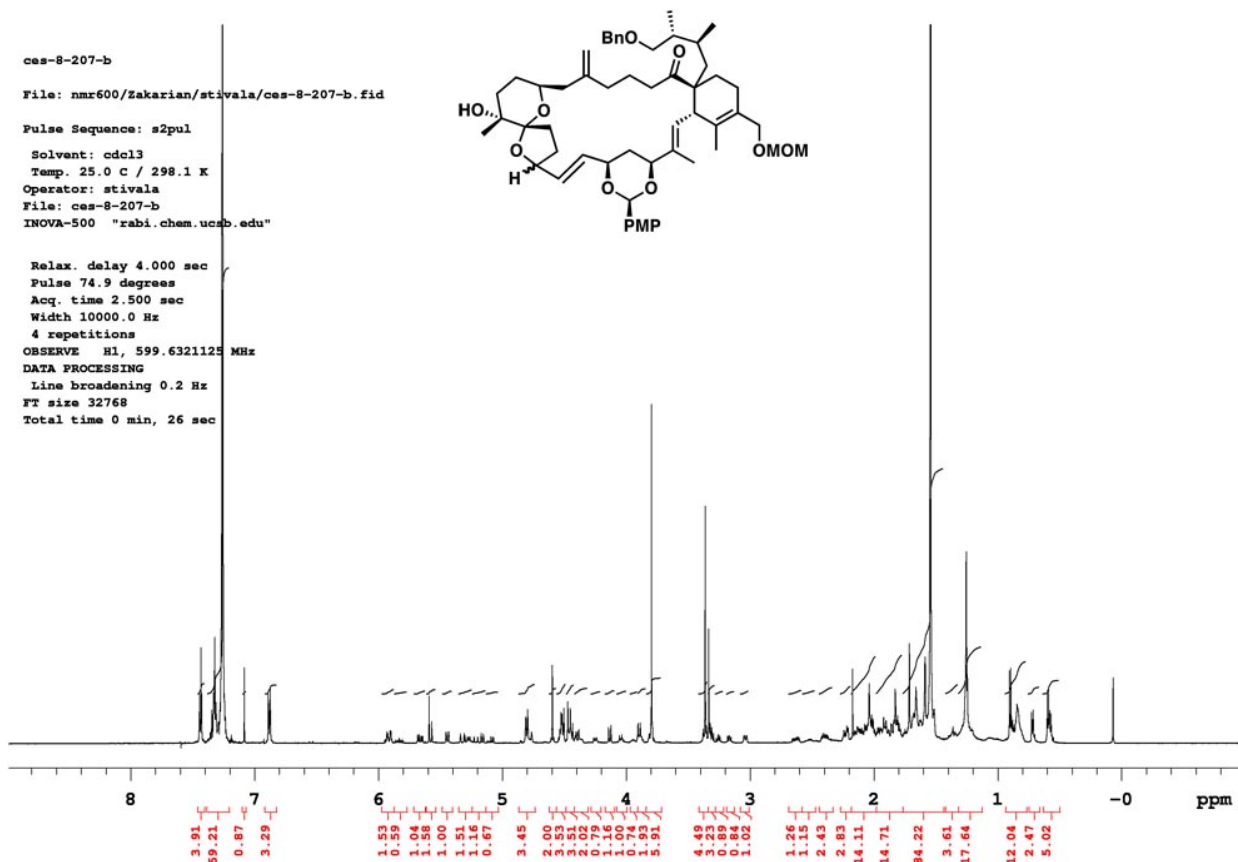

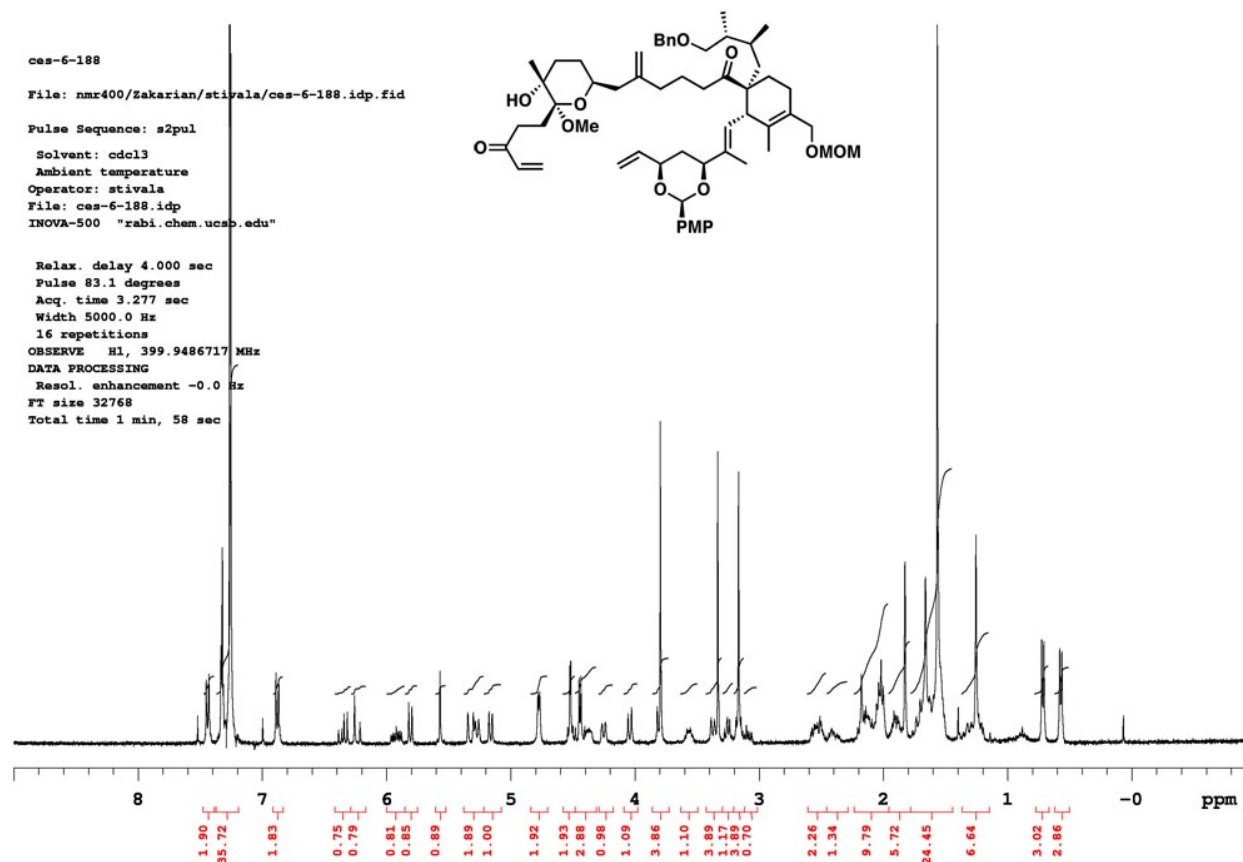

Supplement: NIHMS377938-supplement-SI2.pdf [file NIHMS377938-supplement-SI2.pdf]
